# Supplementary material for: Leveraging machine learning to consolidate the diversity in experimental results of perovskite solar cells
Source: Royal Society of Chemistry journal article supplement (doi:10.1039/d3ra02305b), 2023-01-01
Supplement: d3ra02305b1.pdf [file d3ra02305b1.pdf]

## Supporting information

### Leveraging Machine Learning to Consolidate the Diversity in Experimental Results of Perovskite Solar Cells

Wahid Hussain<sup>a</sup>, Samina Sawar<sup>b</sup>, Muhammad Sultan<sup>c,\*</sup>

<sup>a</sup> *Department of Physics, Quaid-i-Azam University, 45320, Islamabad, Pakistan*

<sup>b</sup> *Department of Plant sciences, Quaid-i-Azam University, 45320, Islamabad, Pakistan*

<sup>c</sup> *Department of Physics, Kohsar University Murree, 47150, Punjab, Pakistan*

\*Corresponding author: [muhammad.sultan@kum.edu.pk](mailto:muhammad.sultan@kum.edu.pk)

Figure 1: Figure 1 shows the correlation matrix of input variables. The correlation value range is from 1 to -1. Where positive value means there is a positive linear correlation between the two variables while negative values indicate the negative correlation between them.

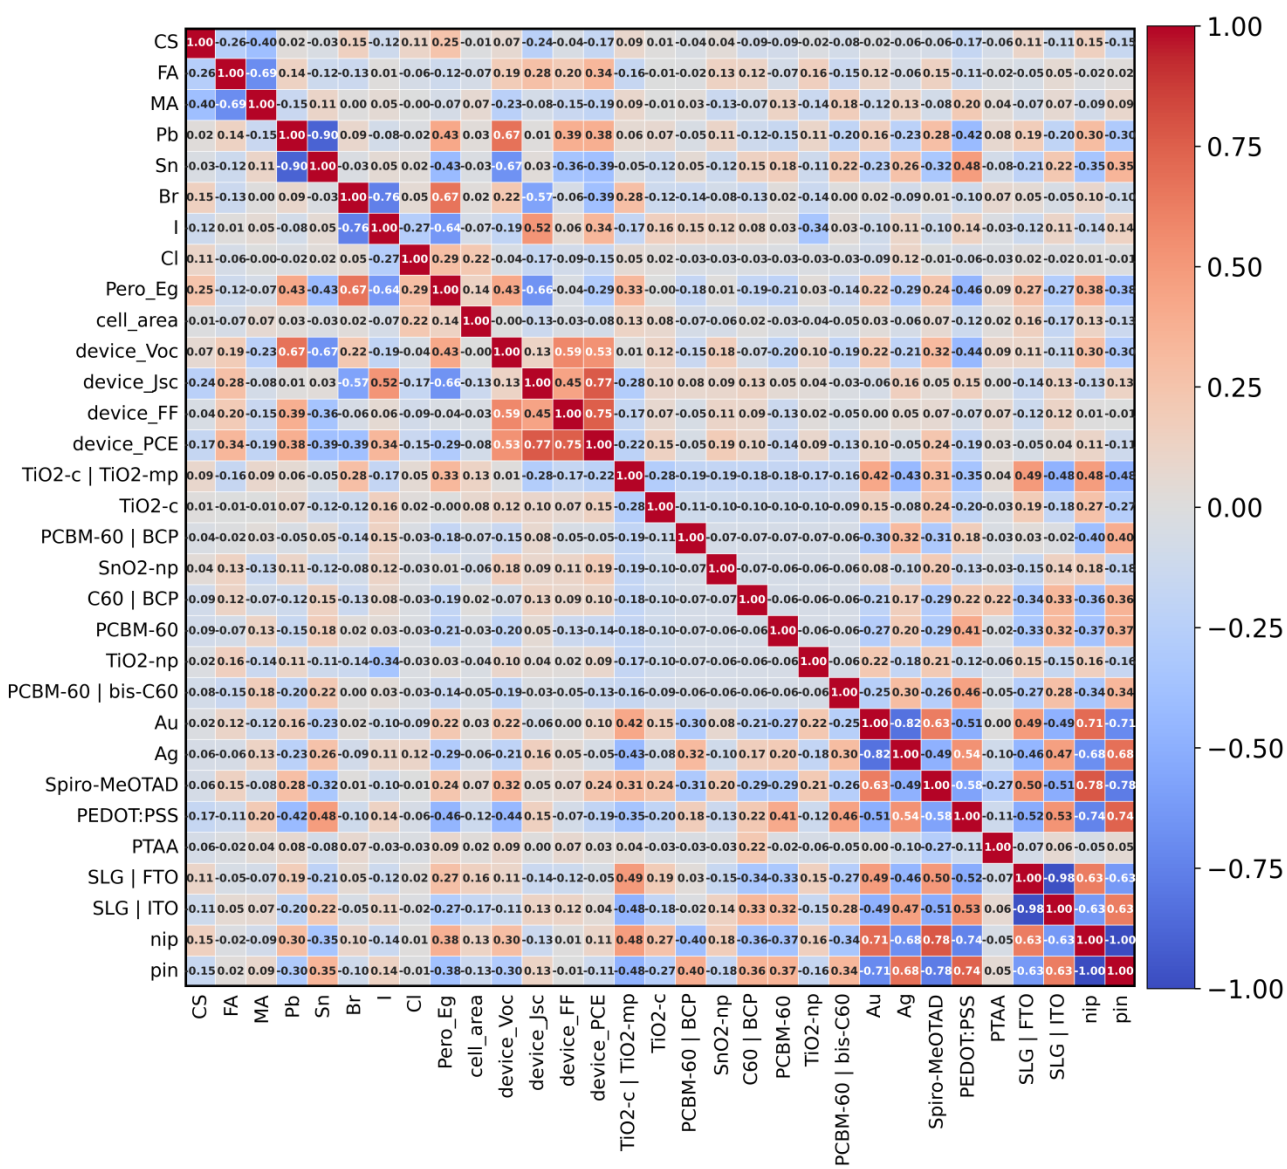

Figure 2: Figure 2 illustrate the SHAP value of XGBRegressor model output for PCE prediction. The color bar represents the features importance value in descending order. The density and each color point represent the number of samples. Also the color bar indicates the feature importance in descending order.

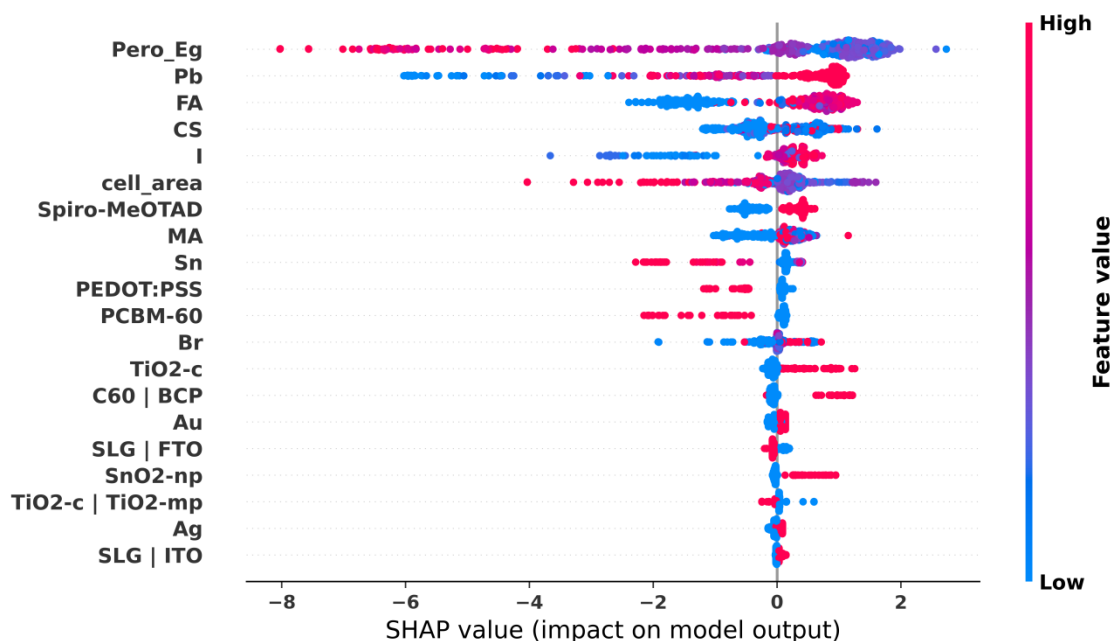

**Perovskite database:**

The full data having 42000 data samples can be obtained by using the following link.

[Perovskite database](#)

**Curated refined band gap dataset:**

Dataset obtained from perovskite database for band gap prediction it contains 1106 data samples .

Also the PCE dataset would be made available upon request.

| CS | FA | MA   | BA   | Pb | Sn | Sb | Bi | Br  | I   | Cl | Pero_Eg |
|----|----|------|------|----|----|----|----|-----|-----|----|---------|
| 0  | 0  | 0    | 2    | 1  | 0  | 0  | 0  | 0   | 1   | 0  | 2.35    |
| 0  | 0  | 0.75 | 0.5  | 1  | 0  | 0  | 0  | 0   | 1   | 0  | 1.88    |
| 0  | 0  | 0.67 | 0.67 | 1  | 0  | 0  | 0  | 0   | 1   | 0  | 1.81    |
| 1  | 0  | 0    | 0    | 0  | 1  | 0  | 0  | 0   | 1   | 0  | 1.27    |
| 1  | 0  | 0    | 0    | 0  | 1  | 0  | 0  | 1   | 0   | 0  | 1.75    |
| 1  | 0  | 0    | 0    | 0  | 1  | 0  | 0  | 1   | 2   | 0  | 1.37    |
| 1  | 0  | 0    | 0    | 0  | 1  | 0  | 0  | 2   | 1   | 0  | 1.65    |
| 1  | 0  | 0    | 0    | 0  | 1  | 0  | 0  | 0.5 | 2.5 | 0  | 1.375   |

|       |   |   |   |       |      |   |      |      |      |      |       |
|-------|---|---|---|-------|------|---|------|------|------|------|-------|
| 1     | 0 | 0 | 0 | 0     | 1    | 0 | 0    | 0.6  | 2.4  | 0    | 1.4   |
| 1     | 0 | 0 | 0 | 0     | 1    | 0 | 0    | 2.4  | 0.5  | 0    | 2.36  |
| 1     | 0 | 0 | 0 | 1     | 0    | 0 | 0    | 0    | 1    | 0    | 1.73  |
| 1     | 0 | 0 | 0 | 1     | 0    | 0 | 0    | 1    | 2    | 0    | 1.92  |
| 1     | 0 | 0 | 0 | 1     | 0    | 0 | 0    | 1    | 0    | 0    | 2.3   |
| 1     | 0 | 0 | 0 | 1     | 0    | 0 | 0    | 2    | 1    | 0    | 2.07  |
| 1     | 0 | 0 | 0 | 1     | 0    | 0 | 0    | 0.15 | 2.85 | 0    | 1.7   |
| 0.003 | 0 | 0 | 0 | 0.997 | 0    | 0 | 0    | 1    | 0    | 0    | 2.2   |
| 0.005 | 0 | 0 | 0 | 0.995 | 0    | 0 | 0    | 1    | 0    | 0    | 2.29  |
| 0.01  | 0 | 0 | 0 | 0.99  | 0    | 0 | 0    | 1    | 0    | 0    | 2.11  |
| 0.03  | 0 | 0 | 0 | 0.97  | 0    | 0 | 0    | 1    | 0    | 0    | 1.89  |
| 1     | 0 | 0 | 0 | 1     | 1    | 1 | 1    | 2    | 1    | 0    | 2.08  |
| 1     | 0 | 0 | 0 | 1     | 0    | 0 | 0    | 0.09 | 2.91 | 0    | 1.77  |
| 1     | 0 | 0 | 0 | 1     | 0    | 0 | 0    | 0.21 | 2.79 | 0    | 1.81  |
| 1     | 0 | 0 | 0 | 0.96  | 0    | 0 | 0.04 | 0    | 1    | 0    | 1.45  |
| 1     | 0 | 0 | 0 | 0.1   | 0    | 0 | 0.9  | 0    | 1    | 0    | 1.22  |
| 1     | 0 | 0 | 0 | 0.3   | 0    | 0 | 0.7  | 0    | 1    | 0    | 1.29  |
| 1     | 0 | 0 | 0 | 0     | 0    | 0 | 1    | 0    | 1    | 0    | 1.78  |
| 1     | 0 | 0 | 0 | 1     | 0    | 0 | 0    | 1    | 1    | 0    | 1.77  |
| 1     | 0 | 0 | 0 | 0.9   | 0.1  | 0 | 0    | 2    | 1    | 0    | 1.79  |
| 1     | 0 | 0 | 0 | 1     | 0    | 0 | 0    | 1.5  | 1.5  | 0    | 1.7   |
| 1     | 0 | 0 | 0 | 1     | 0    | 0 | 0    | 2.4  | 0.1  | 0    | 2.38  |
| 1     | 0 | 0 | 0 | 1     | 0    | 0 | 0    | 2.4  | 0.2  | 0    | 2.35  |
| 1     | 0 | 0 | 0 | 1     | 0    | 0 | 0    | 2.4  | 0.3  | 0    | 2.32  |
| 1     | 1 | 0 | 0 | 0     | 0    | 0 | 1    | 1    | 0    | 0    | 2.2   |
| 1     | 0 | 0 | 0 | 0.98  | 0    | 0 | 0    | 0    | 1    | 0    | 1.71  |
| 1     | 0 | 0 | 0 | 0.95  | 0    | 0 | 0    | 0    | 1    | 0    | 1.75  |
| 1     | 0 | 0 | 0 | 0.93  | 0    | 0 | 0    | 0    | 1    | 0    | 1.8   |
| 1     | 0 | 0 | 0 | 0.9   | 0    | 0 | 0    | 0    | 1    | 0    | 1.84  |
| 1     | 0 | 0 | 0 | 0.85  | 0    | 0 | 0    | 0    | 1    | 0    | 1.93  |
| 1     | 0 | 0 | 0 | 1     | 0    | 0 | 0    | 0.31 | 2.69 | 0    | 1.75  |
| 1     | 0 | 0 | 0 | 0.5   | 0.5  | 0 | 0    | 1    | 2    | 0    |       |
| 1     | 0 | 0 | 0 | 0.9   | 0    | 0 | 0    | 1    | 2    | 0    | 1.895 |
| 1     | 0 | 0 | 0 | 0.8   | 0    | 0 | 0    | 1    | 2    | 0    | 1.889 |
| 1     | 0 | 0 | 0 | 0.7   | 0    | 0 | 0    | 1    | 2    | 0    | 1.881 |
| 1     | 0 | 0 | 0 | 0     | 0.05 | 0 | 0    | 0    | 2.95 | 0    |       |
| 1     | 0 | 0 | 0 | 0.94  | 0    | 0 | 0    | 1    | 2    | 0    |       |
| 1     | 0 | 0 | 0 | 0.9   | 0    | 0 | 0    | 2    | 1    | 0    | 1.88  |
| 1     | 0 | 0 | 0 | 0.88  | 0    | 0 | 0    | 1    | 2    | 0    |       |
| 1     | 0 | 0 | 0 | 1     | 0    | 0 | 0    | 0.75 | 2.25 | 0    | 1.79  |
| 1     | 0 | 0 | 0 | 1     | 0    | 0 | 0    | 1.9  | 1.1  | 0    | 1.7   |
| 1     | 0 | 0 | 0 | 0.98  | 0    | 0 | 0    | 1    | 2    | 0    | 1.919 |
| 1     | 0 | 0 | 0 | 0.97  | 0    | 0 | 0    | 1    | 2    | 0    | 1.9   |
| 1     | 0 | 0 | 0 | 1     | 0    | 0 | 0    | 1    | 0.12 | 1.88 | 1.85  |
| 1     | 0 | 0 | 0 | 1     | 0    | 0 | 0    | 1    | 0.22 | 1.78 | 1.85  |
| 1     | 0 | 0 | 0 | 1     | 0    | 0 | 0    | 1    | 0.28 | 1.72 | 1.85  |
| 1     | 0 | 0 | 0 | 1     | 0    | 0 | 0    | 1    | 1.88 | 0.12 | 1.85  |
| 1     | 0 | 0 | 0 | 1     | 0    | 0 | 0    | 1    | 1.78 | 0.22 | 1.85  |

|       |       |   |   |   |       |        |   |   |       |       |      |       |
|-------|-------|---|---|---|-------|--------|---|---|-------|-------|------|-------|
| 1     |       | 0 | 0 | 0 | 1     | 0      | 0 | 0 | 1     | 1.72  | 0.28 | 1.85  |
| 1     |       | 0 | 0 | 0 | 0.97  | 0      | 0 | 0 | 1     | 0     | 0    | 2.27  |
| 1     |       | 0 | 0 | 0 | 0.03  | 0      | 0 | 0 | 1     | 0     | 0    | 2.27  |
| 1     |       | 0 | 0 | 0 | 1     | 0      | 0 | 0 | 0.45  | 2.55  | 0    | 1.84  |
| 1     |       | 0 | 0 | 0 | 1     | 0      | 0 | 0 | 0.2   | 2.8   | 0    | 1.82  |
| 1     |       | 0 | 0 | 0 | 0.6   | 0.4    | 0 | 0 | 0     | 1     | 0    | 1.38  |
| 0.05  | 0.95  |   | 0 | 0 | 1     | 0      | 0 | 0 | 0.15  | 2.85  | 0    | 1.48  |
| 0.1   | 0.9   |   | 0 | 0 | 1     | 0      | 0 | 0 | 0.3   | 2.7   | 0    | 1.48  |
| 0.15  | 0.85  |   | 0 | 0 | 1     | 0      | 0 | 0 | 0.45  | 2.55  | 0    | 1.48  |
| 0.2   | 0.8   |   | 0 | 0 | 1     | 0      | 0 | 0 | 0.6   | 2.4   | 0    | 1.48  |
| 0.25  | 0.75  |   | 0 | 0 | 1     | 0      | 0 | 0 | 0.6   | 2.4   | 0    | 1.68  |
| 0.25  | 0.75  |   | 0 | 0 | 1     | 0      | 0 | 0 | 0     | 1     | 0    | 1.58  |
| 0.17  | 0.83  |   | 0 | 0 | 1     | 0      | 0 | 0 | 0.8   | 2.2   |      | 1.72  |
| 0.17  | 0.83  |   | 0 | 0 | 1     | 0      | 0 | 0 | 1.2   | 1.8   |      | 1.79  |
| 0.17  | 0.83  |   | 0 | 0 | 1     | 0      | 0 | 0 | 1.5   | 1.5   |      | 1.86  |
| 0.17  | 0.83  |   | 0 | 0 | 1     | 0      | 0 | 0 | 1.8   | 1.2   |      | 1.93  |
| 0.2   | 0.8   |   | 0 | 0 | 1     | 0      | 0 | 0 | 0.9   | 2.1   |      | 1.75  |
| 0.17  | 0.83  |   | 0 | 0 | 1     | 0      | 0 | 0 | 1.2   | 2.8   |      | 1.75  |
| 0.13  | 0.87  |   | 0 | 0 | 1     | 0      | 0 | 0 | 1     | 2     |      | 1.72  |
|       | 1 0.8 |   | 0 | 0 | 1     | 0      | 0 | 0 | 0.42  | 2.58  |      | 1.59  |
| 0.2   | 0.8   |   | 0 | 0 | 1     | 0      | 0 | 0 | 1.2   | 1.8   |      | 1.77  |
| 0.17  | 0.83  |   | 0 | 0 | 1     | 0      | 0 | 0 | 0.17  | 0.83  |      | 1.6   |
| 0.15  | 0.85  |   | 0 | 0 | 1     | 0      | 0 | 0 | 0.12  | 2.88  |      | 1.6   |
| 0.17  | 0.83  |   | 0 | 0 | 1     | 0      | 0 | 0 | 0.6   | 2.4   |      | 1.61  |
| 0.3   | 0.7   |   | 0 | 0 | 1     | 0      | 0 | 0 | 1     | 0     |      | 2.287 |
| 0.1   | 0.9   |   | 0 | 0 | 1     | 0      | 0 | 0 | 1     | 0     |      | 2.277 |
| 0.2   | 0.8   |   | 0 | 0 | 1     | 0      | 0 | 0 | 0.75  | 2.25  |      | 1.67  |
| 0.05  | 0.95  |   | 0 | 0 | 1     | 0      | 0 | 0 | 0     | 1     |      | 1.48  |
| 0.1   | 0.9   |   | 0 | 0 | 1     | 0      | 0 | 0 | 0.3   | 2.7   |      | 1.62  |
| 0.4   | 0.6   |   | 0 | 0 | 1     | 0      | 0 | 0 | 1.05  | 1.95  |      | 1.8   |
| 0.25  | 0.75  |   | 0 | 0 | 1     | 0      | 0 | 0 | 0.3   | 2.7   |      | 1.57  |
| 0.125 | 0.875 |   | 0 | 0 | 1     | 0      | 0 | 0 | 0.375 | 2.625 |      | 1.6   |
| 0.15  | 0.85  |   | 0 | 0 | 1     | 0      | 0 | 0 | 0.81  | 2.19  |      | 1.72  |
| 0.25  | 0.75  |   | 0 | 0 | 1     | 0      | 0 | 0 | 0.6   | 2.4   |      | 1.72  |
| 0.17  | 0.83  |   | 0 | 0 | 1     | 0      | 0 | 0 | 0.51  | 2.49  |      | 1.64  |
| 0.25  | 0.75  |   | 0 | 0 | 1     | 0      | 0 | 0 | 0.51  | 2.49  |      | 1.63  |
| 0.25  | 0.75  |   | 0 | 0 | 0.5   | 0.5    | 0 | 0 | 0     | 1     |      | 1.24  |
| 0.15  | 0.85  |   | 0 | 0 | 1     | 0      | 0 | 0 | 2.1   | 0.9   |      | 2     |
| 0.2   | 0.8   |   | 0 | 0 | 0.75  | 0.25   | 0 | 0 |       | 1     |      | 1.35  |
| 0.2   | 0.8   |   | 0 | 0 | 0.5   | 0.5    | 0 | 0 |       | 1     |      | 1.3   |
| 0.2   | 0.8   |   | 0 | 0 | 0.25  | 0.75   | 0 | 0 |       | 1     |      | 1.2   |
| 0.2   | 0.8   |   | 0 | 0 | 0     | 1      | 0 | 0 |       | 1     |      | 1.2   |
| 0.15  | 0.85  |   | 0 | 0 | 0.375 | 0.625  | 0 | 0 |       | 1     |      | 1.24  |
| 0.25  | 0.75  |   | 0 | 0 | 0.37  | 0.6255 | 0 | 0 |       | 1     |      | 1.24  |
| 0.2   | 0.8   |   | 0 | 0 | 0.3   | 0.7    | 0 | 0 |       | 1     |      | 1.35  |
| 0.3   | 0.7   |   | 0 | 0 | 0.7   | 0.3    | 0 | 0 |       | 1     |      | 1.3   |
| 0.25  | 0.75  |   | 0 | 0 | 0.5   | 0.5    | 0 | 0 |       | 1     |      | 1.27  |
| 0.4   | 0.6   |   | 0 | 0 | 1     | 0      | 0 | 0 | 0.9   | 2.1   |      | 1.76  |

|       |       |   |   |   |   |   |   |       |       |       |
|-------|-------|---|---|---|---|---|---|-------|-------|-------|
| 0.1   | 0.9   | 0 | 0 | 1 | 0 | 0 | 0 |       | 1     | 1.509 |
| 0.2   | 0.8   | 0 | 0 | 1 | 0 | 0 | 0 |       | 1     | 1.515 |
| 0.3   | 0.7   | 0 | 0 | 1 | 0 | 0 | 0 |       | 1     | 1.523 |
| 0.5   | 0.5   | 0 | 0 | 1 | 0 | 0 | 0 | 0.51  | 2.49  | 1.62  |
| 0.03  | 0.97  | 0 | 0 | 1 | 0 | 0 | 0 |       | 1     | 1.553 |
| 0.07  | 0.93  | 0 | 0 | 1 | 0 | 0 | 0 |       | 1     | 1.54  |
| 0.17  | 0.83  | 0 | 0 | 1 | 0 | 0 | 0 |       | 1     | 1.56  |
| 0.05  | 0.95  | 0 | 0 | 1 | 0 | 0 | 0 |       | 1     | 1.53  |
| 0.07  | 0.93  | 0 | 0 | 1 | 0 | 0 | 0 | 0.15  | 2.85  | 1.62  |
| 0.15  | 0.85  | 0 | 0 | 1 | 0 | 0 | 0 | 0.15  | 2.85  | 1.62  |
| 0.3   | 0.7   | 0 | 0 | 1 | 0 | 0 | 0 | 0.15  | 2.85  | 1.62  |
| 0.45  | 0.55  | 0 | 0 | 1 | 0 | 0 | 0 | 0.15  | 2.85  | 1.62  |
| 0.15  | 0.85  | 0 | 0 | 1 | 0 | 0 | 0 | 0.3   | 2.7   | 1.55  |
| 0.2   | 0.8   | 0 | 0 | 1 | 0 | 0 | 0 | 1.05  | 1.95  | 1.76  |
| 0.25  | 0.75  | 0 | 0 | 1 | 0 | 0 | 0 | 0.9   | 2.1   | 1.73  |
| 0.2   | 0.8   | 0 | 0 | 1 | 0 | 0 | 0 | 0     | 1     | 1.59  |
| 0.085 | 0.915 | 0 | 0 | 1 | 0 | 0 | 0 | 0.45  | 2.55  | 1.625 |
| 0.13  | 0.87  | 0 | 0 | 1 | 0 | 0 | 0 | 0.39  | 2.61  | 1.56  |
| 0.1   | 0.9   | 0 | 0 | 1 | 0 | 0 | 0 | 0.9   | 2.1   | 1.7   |
| 0.1   | 0.9   | 0 | 0 | 1 | 0 | 0 | 0 | 0     | 1     | 1.53  |
| 0.15  | 0.85  | 0 | 0 | 1 | 0 | 0 | 0 | 0     | 1     | 1.54  |
| 0.25  | 0.75  | 0 | 0 | 1 | 0 | 0 | 0 | 0     | 1     | 1.54  |
| 0.3   | 0.7   | 0 | 0 | 1 | 0 | 0 | 0 | 0     | 1     | 1.49  |
| 0.1   | 0.9   | 0 | 0 | 1 | 0 | 0 | 0 | 0.09  | 2.91  | 1.54  |
| 0.1   | 0.9   | 0 | 0 | 1 | 0 | 0 | 0 | 0.6   | 2.4   | 1.61  |
| 1     | 0     | 0 | 0 | 1 | 0 | 0 | 0 | 0     | 1     | 1.6   |
| 0.5   | 0.5   | 0 | 0 | 1 | 0 | 0 | 0 | 0     | 1     | 1.63  |
| 0.75  | 0.25  | 0 | 0 | 1 | 0 | 0 | 0 | 0     | 1     | 1.66  |
| 0.2   | 0.8   | 0 | 0 | 1 | 0 | 0 | 0 | 1.5   | 1.5   | 1.82  |
| 0.17  | 0.83  | 0 | 0 | 1 | 0 | 0 | 0 | 0.81  | 2.19  | 1.7   |
| 0.17  | 0.83  | 0 | 0 | 1 | 0 | 0 | 0 | 0.75  | 2.25  | 1.75  |
| 0.15  | 0.85  | 0 | 0 | 1 | 0 | 0 | 0 | 0.9   | 2.1   | 1.72  |
| 1     | 1     | 0 | 0 | 1 | 0 | 0 | 0 | 0.2   | 2.8   | 1.65  |
| 1     | 1     | 0 | 0 | 1 | 0 | 0 | 0 | 0     | 1     | 1.51  |
| 1     | 1     | 0 | 0 | 1 | 0 | 0 | 0 | 1     | 1     | 1.69  |
| 1     | 1     | 0 | 0 | 1 | 0 | 0 | 0 | 1     | 1     | 1     |
| 0.15  | 0.85  | 0 | 0 | 1 | 0 | 0 | 0 | 0.87  | 2.13  | 1.72  |
| 0.05  | 0.95  | 0 | 0 | 1 | 0 | 0 | 0 | 0.15  | 2.85  | 1.55  |
| 0.07  | 0.93  | 0 | 0 | 1 | 0 | 0 | 0 | 0     | 1     | 1.53  |
| 0.4   | 0.6   | 0 | 0 | 1 | 0 | 0 | 0 | 0.095 | 0.905 | 1.61  |
| 0.3   | 0.7   | 0 | 0 | 1 | 0 | 0 | 0 | 0.095 | 0.905 | 1.63  |
| 0.2   | 0.8   | 0 | 0 | 1 | 0 | 0 | 0 | 0.095 | 0.905 | 1.65  |
| 0.1   | 0.9   | 0 | 0 | 1 | 0 | 0 | 0 | 0.095 | 0.905 | 1.56  |
| 0.4   | 0.6   | 0 | 0 | 1 | 0 | 0 | 0 | 0.256 | 0.744 | 1.65  |
| 0.3   | 0.7   | 0 | 0 | 1 | 0 | 0 | 0 | 0.256 | 0.744 | 1.72  |
| 0.2   | 0.8   | 0 | 0 | 1 | 0 | 0 | 0 | 0.256 | 0.744 | 1.71  |
| 0.1   | 0.9   | 0 | 0 | 1 | 0 | 0 | 0 | 0.256 | 0.744 | 1.72  |
| 0.17  | 0.83  | 0 | 0 | 1 | 0 | 0 | 0 | 0     | 1     | 1.51  |

|       |       |       |   |       |       |   |   |      |      |   |       |
|-------|-------|-------|---|-------|-------|---|---|------|------|---|-------|
| 0.17  | 0.83  | 0     | 0 | 0.999 | 0.001 | 0 | 0 | 0    | 1    |   | 1.51  |
| 0.17  | 0.83  | 0     | 0 | 0.995 | 0.005 | 0 | 0 | 0    | 1    |   | 1.52  |
| 0.17  | 0.83  | 0     | 0 | 0.99  | 0.01  | 0 | 0 | 0    | 1    |   | 1.52  |
| 0.17  | 0.83  | 0     | 0 | 0.98  | 0.02  | 0 | 0 | 0    | 1    |   | 1.51  |
| 0.17  | 0.83  | 0     | 0 | 0.95  | 0.05  | 0 | 0 | 0    | 1    |   | 1.52  |
| 0.17  | 0.83  | 0     | 0 | 0.9   | 0.1   | 0 | 0 | 0    | 1    |   | 1.47  |
| 0.17  | 0.83  | 0     | 0 | 0.8   | 0.2   | 0 | 0 | 0    | 1    |   | 1.36  |
| 0.17  | 0.83  | 0     | 0 | 0.7   | 0.3   | 0 | 0 | 0    | 1    |   | 1.32  |
| 0.17  | 0.83  | 0     | 0 | 0.6   | 0.4   | 0 | 0 | 0    | 1    |   | 1.28  |
| 0.17  | 0.83  | 0     | 0 | 0.5   | 0.5   | 0 | 0 | 0    | 1    |   | 1.26  |
| 0.17  | 0.83  | 0     | 0 | 0.4   | 0.6   | 0 | 0 | 0    | 1    |   | 1.25  |
| 0.17  | 0.83  | 0     | 0 | 0.3   | 0.7   | 0 | 0 | 0    | 1    |   | 1.25  |
| 0.15  | 0.85  | 0     | 0 | 1     | 0     | 0 | 0 | 0.45 | 2.55 |   | 1.59  |
| 0.88  | 0.12  | 0     | 0 | 1     | 0     | 0 | 0 | 0    | 1    |   | 1.51  |
| 0.17  | 0.83  | 0     | 0 | 1     | 0     | 0 | 0 | 1    | 2    |   | 1.67  |
| 1     | 1     | 0     | 0 | 1     | 0     | 0 | 0 | 0.3  | 2.7  |   | 1.56  |
| 1     | 1     | 0     | 0 | 1     | 0     | 0 | 0 | 1    | 0    | 1 | 2.32  |
| 0.1   | 0.9   | 0     | 0 | 1     | 0     | 0 | 0 | 0.1  | 2.9  |   | 1.55  |
| 0.08  | 0.92  | 0     | 0 | 1     | 0     | 0 | 0 | 0    | 1    |   | 1.51  |
| 0.88  | 0.12  | 0     | 0 | 1     | 0     | 0 | 0 | 0    | 1    | 0 | 1.5   |
| 0.05  | 0.788 | 0.162 | 0 | 1     | 0     | 0 | 0 | 0.51 | 2.49 |   | 1.59  |
| 0.05  | 0.81  | 0.14  | 0 | 1     | 0     | 0 | 0 | 0.45 | 2.55 |   | 1.56  |
| 0.05  | 0.78  | 0.13  | 0 | 1     | 0     | 0 | 0 | 0.45 | 2.55 |   | 1.6   |
| 0.05  | 0.75  | 0.2   | 0 | 1     | 0     | 0 | 0 | 0    | 1    |   | 1.52  |
| 0.025 | 0.475 | 0.5   | 0 | 0.5   | 0.5   | 0 | 0 | 0    | 1    |   | 1.27  |
| 0.05  | 0.45  | 0.5   | 0 | 0.5   | 0.5   | 0 | 0 | 0    | 1    |   | 1.26  |
| 0.1   | 0.76  | 0.14  | 0 | 1     | 0     | 0 | 0 | 0.51 | 2.49 |   | 1.61  |
| 0.05  | 0.81  | 0.14  | 0 | 0.95  | 0     | 0 | 0 | 0.43 | 2.42 |   | 1.64  |
| 0.05  | 0.79  | 0.16  | 0 | 1     | 0     | 0 | 0 | 0.5  | 2.5  |   | 1.57  |
| 0.05  | 0.79  | 0.16  | 0 | 0.75  | 0.25  | 0 | 0 | 0.5  | 2.5  |   | 1.34  |
| 0.05  | 0.79  | 0.16  | 0 | 0.5   | 0.5   | 0 | 0 | 0.5  | 2.5  |   | 1.31  |
| 0.05  | 0.79  | 0.16  | 0 | 0.25  | 0.75  | 0 | 0 | 0.5  | 2.5  |   | 1.3   |
| 0.1   | 0.75  | 0.15  | 0 | 1     | 0     | 0 | 0 | 0.5  | 2.5  |   | 1.59  |
| 0.1   | 0.75  | 0.15  | 0 | 0.75  | 0.25  | 0 | 0 | 0.5  | 2.5  |   | 1.36  |
| 0.1   | 0.75  | 0.15  | 0 | 0.5   | 0.5   | 0 | 0 | 0.5  | 2.5  |   | 1.31  |
| 0.1   | 0.75  | 0.15  | 0 | 0.25  | 0.75  | 0 | 0 | 0.5  | 2.5  |   | 1.29  |
| 0.2   | 0.66  | 0.14  | 0 | 1     | 0     | 0 | 0 | 0.5  | 2.5  |   | 1.6   |
| 0.2   | 0.66  | 0.14  | 0 | 0.75  | 0.25  | 0 | 0 | 0.5  | 2.5  |   | 1.38  |
| 0.2   | 0.66  | 0.14  | 0 | 0.5   | 0.5   | 0 | 0 | 0.5  | 2.5  |   | 1.31  |
| 0.2   | 0.66  | 0.14  | 0 | 0.25  | 0.75  | 0 | 0 | 0.5  | 2.5  |   | 1.28  |
| 0.05  | 0.8   | 0.15  | 0 | 1     | 0     | 0 | 0 | 0.15 | 2.85 |   | 1.617 |
| 0.05  | 0.79  | 0.16  | 0 | 1     | 0     | 0 | 0 | 0.51 | 2.49 |   | 1.58  |
| 0.05  | 0.83  | 0.12  | 0 | 1     | 0     | 0 | 0 | 0.39 | 2.61 |   | 1.6   |
| 0.05  | 0.8   | 0.15  | 0 | 1     | 0     | 0 | 0 | 0.45 | 2.55 |   | 1.63  |
| 0.1   | 0.81  | 0.09  | 0 | 1     | 0     | 0 | 0 | 0.1  | 2.9  |   | 1.55  |
| 0.07  | 0.785 | 0.115 | 0 | 1     | 0     | 0 | 0 | 0.45 | 2.55 |   | 1.57  |
| 0.05  | 0.76  | 0.19  | 0 | 1     | 0     | 0 | 0 | 0.6  | 2.4  |   | 1.59  |
| 0.2   | 0.2   | 0.6   | 0 | 1     | 0     | 0 | 0 | 0    | 1    |   | 1.64  |

|       |        |        |   |      |      |   |   |       |       |       |
|-------|--------|--------|---|------|------|---|---|-------|-------|-------|
| 0.1   | 0.2    | 0.7    | 0 | 1    | 0    | 0 | 0 | 0     | 1     | 1.62  |
| 0.3   | 0.2    | 0.5    | 0 | 1    | 0    | 0 | 0 | 0     | 1     | 1.64  |
| 0.4   | 0.2    | 0.4    | 0 | 1    | 0    | 0 | 0 | 0     | 1     | 1.64  |
| 0.08  | 0.76   | 0.15   | 0 | 1    | 0    | 0 | 0 | 0.51  | 2.49  | 1.62  |
| 0.12  | 0.83   | 0.05   | 0 | 1    | 0    | 0 | 0 | 1.2   | 1.8   | 1.74  |
| 0.05  | 0.5    | 0.45   | 0 | 0.5  | 0.5  | 0 | 0 | 0     | 1     | 1.22  |
| 0.1   | 0.75   | 0.15   | 0 | 1    | 0    | 0 | 0 | 1     | 2     | 1.73  |
| 0.05  | 0.79   | 0.16   | 0 | 1    | 0    | 0 | 0 | 1.2   | 2.6   | 1.71  |
| 0.05  | 0.38   | 0.57   | 0 | 1    | 0    | 0 | 0 | 0.2   | 2.8   | 1.57  |
| 0.1   | 0.36   | 0.54   | 0 | 1    | 0    | 0 | 0 | 0.2   | 2.8   | 1.59  |
| 0.2   | 0.32   | 0.48   | 0 | 1    | 0    | 0 | 0 | 0.2   | 2.8   | 1.607 |
| 0.05  | 0.79   | 0.16   | 0 | 1    | 0    | 0 | 0 | 0.45  | 2.55  | 1.63  |
| 0.05  | 0.79   | 0.16   | 0 | 1    | 0    | 0 | 0 | 0     | 1     | 1.55  |
| 0.04  | 0.82   | 0.14   | 0 | 1    | 0    | 0 | 0 | 0.42  | 2.58  | 1.58  |
| 0.05  | 0.76   | 0.19   | 0 | 1    | 0    | 0 | 0 | 0.57  | 2.32  | 1.69  |
| 0.03  | 0.945  | 0.025  | 0 | 1    | 0    | 0 | 0 | 0.075 | 2.925 | 1.56  |
| 0.08  | 0.55   | 0.37   | 0 | 1    | 0    | 0 | 0 | 0     | 1     | 1.53  |
| 0.05  | 0.79   | 0.16   | 0 | 1    | 0    | 0 | 0 | 0.48  | 2.52  | 1.61  |
| 0.1   | 0.75   | 0.24   | 0 | 1    | 0    | 0 | 0 | 0.51  | 2.49  | 1.61  |
| 0.05  | 0.79   | 0.16   | 0 | 1    | 0    | 0 | 0 | 1.5   | 1.5   | 1.85  |
| 0.1   | 0.75   | 0.15   | 0 | 1    | 0    | 0 | 0 | 0.51  | 2.49  | 1.63  |
| 0.13  | 0.72   | 0.16   | 0 | 1    | 0    | 0 | 0 | 0.51  | 2.49  | 1.63  |
| 0.5   | 0.75   | 0.1    | 0 | 1    | 0    | 0 | 0 | 0.51  | 2.49  | 1.63  |
| 0.2   | 0.75   | 0.05   | 0 | 1    | 0    | 0 | 0 | 0.51  | 2.49  | 1.63  |
| 0.05  | 0.83   | 0.12   | 0 | 1    | 0    | 0 | 0 | 0.51  | 2.49  | 1.63  |
| 0.1   | 0.83   | 0.07   | 0 | 1    | 0    | 0 | 0 | 0.51  | 2.49  | 1.63  |
| 0.14  | 0.83   | 0.03   | 0 | 1    | 0    | 0 | 0 | 0.51  | 2.49  | 1.63  |
| 0.05  | 0.68   | 0.26   | 0 | 0.75 | 0.25 | 0 | 0 | 0.4   | 2.6   | 1.36  |
| 0.01  | 0.39   | 0.6    | 0 | 1    | 0    | 0 | 0 | 0.025 | 2.975 | 1.6   |
| 0.02  | 0.38   | 0.6    | 0 | 1    | 0    | 0 | 0 | 0.025 | 2.975 | 1.6   |
| 0.03  | 0.37   | 0.6    | 0 | 1    | 0    | 0 | 0 | 0.025 | 2.975 | 1.6   |
| 0.5   | 0.4    | 0.1    | 0 | 1    | 0    | 0 | 0 | 0.51  | 2.49  | 1.7   |
| 0.07  | 0.77   | 0.16   | 0 | 1    | 0    | 0 | 0 | 0.5   | 2.5   | 1.639 |
| 0.04  | 0.8    | 0.16   | 0 | 1    | 0    | 0 | 0 | 0.5   | 2.5   | 1.632 |
| 0.03  | 0.81   | 0.16   | 0 | 1    | 0    | 0 | 0 | 0.5   | 2.5   | 1.63  |
| 0.05  | 0.7885 | 0.1615 | 0 | 1    | 0    | 0 | 0 | 0.3   | 2.7   | 1.55  |
| 0.2   | 0.664  | 0.336  | 0 | 1    | 0    | 0 | 0 | 1.05  | 1.95  | 1.77  |
| 0.1   | 0.1    | 0.8    | 0 | 1    | 0    | 0 | 0 | 0     | 1     | 1.5   |
| 0.05  | 0.85   | 0.1    | 0 | 1    | 0    | 0 | 0 | 0.45  | 2.45  | 1.59  |
| 0.05  | 0.7885 | 0.1615 | 0 | 1    | 0    | 0 | 0 | 0.51  | 2.49  | 1.57  |
| 0.05  | 0.57   | 0.38   | 0 | 1    | 0    | 0 | 0 | 0     | 1     | 1.54  |
| 0.1   | 0.54   | 0.36   | 0 | 1    | 0    | 0 | 0 | 0     | 1     | 1.51  |
| 0.025 | 0.825  | 0.15   | 0 | 1    | 0    | 0 | 0 | 0.45  | 2.55  | 1.651 |
| 0.05  | 0.79   | 0.16   | 0 | 1    | 0    | 0 | 0 | 2.4   | 2.49  | 1.63  |
| 0.07  | 0.73   | 0.2    | 0 | 1    | 0    | 0 | 0 | 0.47  | 2.53  | 1.6   |
| 0.1   | 0.74   | 0.153  | 0 | 1    | 0    | 0 | 0 | 0.51  | 2.49  | 1.61  |
| 0.16  | 0.8    | 0.04   | 0 | 1    | 0    | 0 | 0 | 1.5   | 1.5   | 1.82  |
| 0.16  | 0.8    | 0.04   | 0 | 1    | 0    | 0 | 0 | 1.71  | 1.29  | 1.89  |



|        |        |        |   |   |   |   |   |        |         |       |
|--------|--------|--------|---|---|---|---|---|--------|---------|-------|
| 0.16   | 0.8    | 0.04   | 0 | 1 | 0 | 0 | 0 | 1.83   | 1.17    | 1.91  |
| 0.15   | 0.65   | 0.2    | 0 | 1 | 0 | 0 | 0 | 0.6    | 2.4     | 1.68  |
| 0.05   | 0.7885 | 0.1615 | 0 | 1 | 0 | 0 | 0 | 0.4845 | 2.51555 | 1.6   |
| 0.07   | 0.79   | 0.14   | 0 | 1 | 0 | 0 | 0 | 0.45   | 2.55    | 1.6   |
| 0.05   | 0.8075 | 0.1425 | 0 | 1 | 0 | 0 | 0 | 0.45   | 2.55    | 1.64  |
| 0.05   | 0.49   | 0.16   | 0 | 1 | 0 | 0 | 0 | 0.51   | 2.49    | 1.73  |
| 0.1    | 0.747  | 0.153  | 0 | 1 | 0 | 0 | 0 | 0.51   | 2.49    | 1.73  |
| 0.05   | 0.7885 | 0.1441 | 0 | 1 | 0 | 0 | 0 | 0.3    | 2.7     | 1.55  |
| 0.05   | 0.7    | 0.25   | 0 | 1 | 0 | 0 | 0 | 0      | 1       | 1.51  |
| 0.05   | 0.79   | 0.16   | 0 | 1 | 0 | 0 | 0 | 0.31   | 2.7     | 1.59  |
| 0.05   | 0.81   | 0.14   | 0 | 1 | 0 | 0 | 0 | 0.4    | 2.6     | 1.61  |
| 0.08   | 0.78   | 0.14   | 0 | 1 | 0 | 0 | 0 | 0.42   | 2.58    | 1.61  |
| 0.05   | 0.76   | 0.16   | 0 | 1 | 0 | 0 | 0 | 0.49   | 2.51    | 1.6   |
| 0.79   | 0.16   | 0.1    | 0 | 1 | 0 | 0 | 0 | 1      | 2       | 1.73  |
| 0.15   | 0.71   | 0.14   | 0 | 1 | 0 | 0 | 0 | 0.9    | 2.1     | 1.7   |
| 0.05   | 0.85   | 0.1    | 0 | 1 | 0 | 0 | 0 | 0.03   | 2.97    | 1.598 |
| 0.1    | 0.81   | 0.09   | 0 | 1 | 0 | 0 | 0 | 0.03   | 2.97    | 1.6   |
| 0.15   | 0.76   | 0.09   | 0 | 1 | 0 | 0 | 0 | 0.03   | 2.97    | 1.599 |
| 0.2    | 0.72   | 0.08   | 0 | 1 | 0 | 0 | 0 | 0.03   | 2.97    | 1.62  |
| 0.12   | 0.5    | 0.38   | 0 | 1 | 0 | 0 | 0 | 0.96   | 2.04    | 1.72  |
| 0.08   | 0.78   | 0.14   | 0 | 1 | 0 | 0 | 0 | 0.42   | 2.38    | 1.61  |
| 0.1    | 0.765  | 0.135  | 0 | 1 | 0 | 0 | 0 | 0.45   | 2.55    | 1.611 |
| 0.07   | 0.78   | 0.15   | 0 | 1 | 0 | 0 | 0 | 0.45   | 2.55    | 1.61  |
| 0.05   | 0.65   | 0.3    | 0 | 1 | 0 | 0 | 0 | 0.15   | 2.85    | 1.55  |
| 0.06   | 0.79   | 0.15   | 0 | 1 | 0 | 0 | 0 | 0.45   | 2.55    | 1.64  |
| 0.04   | 0.8    | 0.16   | 0 | 1 | 0 | 0 | 0 | 0.49   | 2.51    | 1.61  |
| 0.1    | 0.75   | 0.15   | 0 | 1 | 0 | 0 | 0 | 0.45   | 2.55    | 1.63  |
| 0.3    | 0.6    | 0.1    | 0 | 1 | 0 | 0 | 0 | 0.095  | 0.905   | 1.65  |
| 0.2    | 0.6    | 0.2    | 0 | 1 | 0 | 0 | 0 | 0.095  | 0.905   | 1.64  |
| 0.1    | 0.6    | 0.3    | 0 | 1 | 0 | 0 | 0 | 0.095  | 0.905   | 1.64  |
| 0.2668 | 0.666  | 0.0664 | 0 | 1 | 0 | 0 | 0 | 0.095  | 0.905   | 1.65  |
| 0.0664 | 0.666  | 0.2668 | 0 | 1 | 0 | 0 | 0 | 0.095  | 0.905   | 1.63  |
| 0.133  | 0.733  | 0.133  | 0 | 1 | 0 | 0 | 0 | 0.095  | 0.905   | 1.65  |
| 0.0664 | 0.8668 | 0.0664 | 0 | 1 | 0 | 0 | 0 | 0.095  | 0.905   | 1.63  |
| 0.3    | 0.6    | 0.1    | 0 | 1 | 0 | 0 | 0 | 0.256  | 0.744   | 1.72  |
| 0.2    | 0.6    | 0.2    | 0 | 1 | 0 | 0 | 0 | 0.256  | 0.744   | 1.7   |
| 0.1    | 0.6    | 0.3    | 0 | 1 | 0 | 0 | 0 | 0.256  | 0.744   | 1.7   |
| 0.2668 | 0.666  | 0.0664 | 0 | 1 | 0 | 0 | 0 | 0.256  | 0.744   | 1.71  |
| 0.0664 | 0.666  | 0.2668 | 0 | 1 | 0 | 0 | 0 | 0.256  | 0.744   | 1.71  |
| 0.133  | 0.733  | 0.133  | 0 | 1 | 0 | 0 | 0 | 0.256  | 0.744   | 1.71  |
| 0.0664 | 0.8668 | 0.0664 | 0 | 1 | 0 | 0 | 0 | 0.256  | 0.744   | 1.7   |
| 0.05   | 0.83   | 0.17   | 0 | 1 | 0 | 0 | 0 | 0      | 1       | 1.56  |
| 0.05   | 0.07   | 0.25   | 0 | 1 | 0 | 0 | 0 | 0      | 1       | 1.51  |
| 0.05   | 0.81   | 0.14   | 0 | 1 | 0 | 0 | 0 | 2.4    | 0.45    | 1.59  |
| 0.03   | 0.77   | 0.2    | 0 | 1 | 0 | 0 | 0 | 0.46   | 2.54    | 1.5   |
| 0.05   | 0.85   | 0.15   | 0 | 1 | 0 | 0 | 0 | 0.45   | 2.55    | 1.612 |
| 0.1    | 0.85   | 0.15   | 0 | 1 | 0 | 0 | 0 | 0.45   | 2.55    | 1.611 |
| 0.09   | 0.58   | 0.33   | 0 | 1 | 0 | 0 | 0 | 0.65   | 2.35    | 1.59  |

|      |      |      |   |       |       |   |   |      |      |   |       |
|------|------|------|---|-------|-------|---|---|------|------|---|-------|
| 0.05 | 0.79 | 0.16 | 0 | 1     | 0     | 0 | 0 | 0.3  | 2.7  |   | 1.57  |
| 0.05 | 0.83 | 0.12 | 0 | 1     | 0     | 0 | 0 | 0.36 | 2.64 |   | 1.61  |
| 0.05 | 0.79 | 0.16 | 0 | 1     | 0     | 0 | 0 | 1    | 2    |   | 1.61  |
| 0.05 | 0.81 | 0.14 | 0 | 1     | 0     | 0 | 0 | 0.42 | 2.58 |   | 1.61  |
| 0.1  | 0.76 | 0.14 | 0 | 1     | 0     | 0 | 0 | 0.55 | 2.55 |   | 1.61  |
| 0.05 | 0.79 | 0.16 | 0 | 1     | 0     | 0 | 0 | 0.39 | 2.61 |   | 1.59  |
| 0.05 | 0.8  | 0.15 | 0 | 1     | 0     | 0 | 0 | 0.55 | 2.55 |   | 1.61  |
| 0.1  | 0.75 | 0.15 | 0 | 1     | 0     | 0 | 0 | 0.55 | 2.55 |   | 1.63  |
| 0.2  | 0.65 | 0.15 | 0 | 1     | 0     | 0 | 0 | 0.55 | 2.55 |   | 1.85  |
| 0.05 | 0.79 | 0.16 | 0 | 1     | 0     | 0 | 0 | 0.47 | 2.53 |   | 1.59  |
| 0.17 | 0.75 | 0.08 | 0 | 1     | 0     | 0 | 0 | 0.39 | 2.61 |   | 1.61  |
| 0.05 | 0.81 | 0.14 | 0 | 1     | 0     | 0 | 0 | 0.39 | 2.61 |   | 1.59  |
| 0.04 | 0.8  | 0.16 | 0 | 1     | 0     | 0 | 0 | 0.51 | 2.49 |   | 1.61  |
| 0.05 | 0.83 | 0.12 | 0 | 1     | 0     | 0 | 0 | 0.49 | 2.51 |   | 1.6   |
| 0.05 | 0.79 | 0.16 | 0 | 1.1   | 0     | 0 | 0 | 0.51 | 2.49 |   | 1.59  |
| 0.05 | 0.83 | 0.17 | 0 | 1     | 0     | 0 | 0 | 0.51 | 2.49 |   | 1.6   |
| 0.05 | 0.85 | 0.1  | 0 | 1     | 0     | 0 | 0 | 1    | 0    |   | 2.28  |
| 0.06 | 0.79 | 0.15 | 0 | 1     | 0     | 0 | 0 | 1.8  | 1.2  |   | 1.83  |
| 0.05 | 0.79 | 0.16 | 0 | 1     | 0     | 0 | 0 | 0.52 | 2.48 |   | 1.38  |
| 0.05 | 0.79 | 0.16 | 0 | 0.916 | 0.084 | 0 | 0 | 0.52 | 2.48 |   | 1.38  |
| 0.05 | 0.79 | 0.16 | 0 | 0.832 | 0.168 | 0 | 0 | 0.52 | 2.48 |   | 1.38  |
| 0.05 | 0.79 | 0.16 | 0 | 0.748 | 0.252 | 0 | 0 | 0.52 | 2.48 |   | 1.38  |
| 0.05 | 0.79 | 0.16 | 0 | 0.664 | 0.336 | 0 | 0 | 0.52 | 2.48 |   | 1.38  |
| 0.05 | 0.79 | 0.16 | 0 | 0.58  | 0.42  | 0 | 0 | 0.52 | 2.48 |   | 1.38  |
| 0.05 | 0.79 | 0.16 | 0 | 0.84  | 0.84  | 0 | 0 | 0.52 | 2.48 |   | 1.38  |
| 0.06 | 0.78 | 0.16 | 0 | 1     | 0     | 0 | 0 | 0.51 | 2.49 |   | 1.63  |
| 0.15 | 0.75 | 0.1  | 0 | 1     | 0     | 0 | 0 | 0.1  | 2.9  |   | 1.57  |
| 0.15 | 0.75 | 0.1  | 0 | 1     | 0     | 0 | 0 | 0    | 1    |   | 1.554 |
| 0.05 | 0.94 | 0.01 | 0 | 1     | 0     | 0 | 0 | 0.03 | 2.97 |   | 1.55  |
| 0.05 | 0.55 | 0.4  | 0 | 1     | 0     | 0 | 0 | 2.4  | 0.12 |   | 1.56  |
| 0.17 | 0.83 | 0    | 0 | 1     | 0     | 0 | 0 | 2.4  | 0.51 |   | 1.64  |
| 0.05 | 0.81 | 0.14 | 0 | 1     | 0     | 0 | 0 | 0.45 | 2.55 | 0 | 1.58  |
| 1    | 0    | 0    | 0 | 1     | 0     | 0 | 0 | 1.85 | 1.15 | 0 | 2.08  |
| 0.01 | 0    | 0.99 | 0 | 1     | 0     | 0 | 0 | 0.03 | 2.97 | 0 | 1.6   |
| 0.02 | 0    | 0.98 | 0 | 1     | 0     | 0 | 0 | 0.06 | 2.94 | 0 | 1.6   |
| 0.03 | 0    | 0.97 | 0 | 1     | 0     | 0 | 0 | 0.09 | 2.91 | 0 | 1.6   |
| 0.05 | 0    | 0.95 | 0 | 1     | 0     | 0 | 0 |      | 1    |   | 1.51  |
| 0.1  | 0    | 0.9  | 0 | 1     | 0     | 0 | 0 |      | 1    |   | 1.54  |
| 0.2  | 0    | 0.8  | 0 | 1     | 0     | 0 | 0 |      | 1    |   | 1.57  |
| 0.3  | 0    | 0.7  | 0 | 1     | 0     | 0 | 0 |      | 1    |   | 1.58  |
| 0.4  | 0    | 0.6  | 0 | 1     | 0     | 0 | 0 |      | 1    |   | 1.62  |
| 0.6  | 0    | 0.4  | 0 | 1     | 0     | 0 | 0 |      | 1    |   | 1.68  |
| 0.8  | 0    | 0.2  | 0 | 1     | 0     | 0 | 0 |      | 1    |   | 1.72  |
| 0.15 | 0    | 0.85 | 0 | 1     | 0     | 0 | 0 |      | 1    |   | 1.59  |
| 0.15 | 0    | 0.85 | 0 | 1     | 0     | 0 | 0 | 0.45 | 2.55 |   | 1.78  |
| 0.2  | 0    | 0.8  | 0 | 0.5   | 0.5   | 0 | 0 |      | 1    |   | 1.3   |
| 0.3  | 0    | 0.7  | 0 | 0.5   | 0.5   | 0 | 0 |      | 1    |   | 1.28  |
| 0.1  | 0    | 0.9  | 0 | 0.5   | 0.5   | 0 | 0 |      | 1    |   | 1.6   |

|      |      |   |      |   |   |       |       |   |   |   |      |      |      |       |
|------|------|---|------|---|---|-------|-------|---|---|---|------|------|------|-------|
| 0.1  |      | 0 | 0.9  |   | 0 | 0.7   | 0.255 |   | 0 | 0 |      | 1    |      | 1.28  |
| 0.1  |      | 0 | 0.9  |   | 0 | 0.25  | 0.75  |   | 0 | 0 |      | 1    |      | 1.2   |
| 0.05 |      | 0 | 0.95 |   | 0 | 0     | 1     |   | 0 | 0 |      | 1    |      | 1.61  |
| 0.09 |      | 0 | 0.91 |   | 0 | 1     | 0     |   | 0 | 0 |      | 1    |      | 1.59  |
| 0.1  |      | 0 | 0.9  |   | 0 | 0.75  | 0.25  |   | 0 | 0 |      | 1    |      | 1.28  |
| 0.1  |      | 0 | 0.9  |   | 0 | 0     | 1     |   | 0 | 0 | 1.2  | 1.8  |      | 1.82  |
| 0.15 |      | 0 | 0.85 |   | 0 | 1     | 0     |   | 0 | 0 | 1.2  | 1.8  |      | 1.82  |
| 0.05 |      | 0 | 0.95 |   | 0 | 1     | 0     |   | 0 | 0 | 1.2  | 1.8  |      | 1.82  |
| 0.11 |      | 0 | 0.89 |   | 0 | 1     | 0     |   | 0 | 0 |      | 1    |      | 1.62  |
| 0.17 |      | 0 | 0.83 |   | 0 | 1     | 0     |   | 0 | 0 |      | 1    |      | 1.633 |
| 0.23 |      | 0 | 0.77 |   | 0 | 1     | 0     |   | 0 | 0 |      | 1    |      | 1.644 |
| 0.34 |      | 0 | 0.66 |   | 0 | 1     | 0     |   | 0 | 0 |      | 1    |      | 1.652 |
| 0.1  |      | 0 | 0.9  |   | 0 | 1     | 0     |   | 0 | 0 | 1    | 2    |      | 1.77  |
| 0.05 | 0.17 |   | 0.76 | 0 |   | 1     | 0     |   | 0 | 0 | 1    | 2    | 0    | 1.72  |
| 0    | 0    | 0 | 0    | 1 | 1 | 0     | 0     | 0 | 0 | 0 | 1    | 0.8  | 0    | 1.72  |
|      | 0    | 1 |      | 0 | 0 | 1     | 0     |   | 0 | 0 |      | 1    |      | 1.48  |
|      | 0    | 1 |      | 0 | 0 | 1     | 0     |   | 0 | 0 | 1    |      |      | 2.26  |
|      | 0    | 1 |      | 0 | 0 | 0.75  | 0.25  |   | 0 | 0 |      | 1    |      | 1.47  |
|      | 0    | 1 |      | 0 | 0 | 0.5   | 0.5   |   | 0 | 0 |      | 1    |      | 1.57  |
|      | 0    | 1 |      | 0 | 0 | 0.25  | 0.75  |   | 0 | 0 | 1    | 0    | 0    | 2.273 |
|      | 0    | 1 |      | 0 | 0 | 1     | 0     |   | 0 | 0 | 0    | 1    |      | 1.45  |
|      | 0    | 1 |      | 0 | 0 | 0     | 1     |   | 0 | 0 |      | 1    |      | 1.36  |
|      | 0    | 1 |      | 0 | 0 | 0     | 1     |   | 0 | 0 | 0.24 | 2.76 |      | 1.47  |
|      | 0    | 1 |      | 0 | 0 | 0     | 1     |   | 0 | 0 | 0.5  | 2.5  |      | 1.53  |
|      | 0    | 1 |      | 0 | 0 | 0     | 1     |   | 0 | 0 | 0.75 | 2.25 |      | 1.63  |
|      | 0    | 1 |      | 0 | 0 | 0     | 1     |   | 0 | 0 | 1    | 2    |      | 1.7   |
|      | 0    | 1 |      | 0 | 0 | 1     | 0     |   | 0 | 0 | 0.6  | 2.4  |      | 1.57  |
|      | 0    | 1 |      | 0 | 0 | 0.875 | 0.125 |   | 0 | 0 |      | 1    |      | 1.33  |
|      | 0    | 1 |      | 0 | 0 | 0.625 | 0.375 |   | 0 | 0 |      | 1    |      | 1.24  |
|      | 0    | 1 |      | 0 | 0 | 0.375 | 0.625 |   | 0 | 0 |      | 1    |      | 1.21  |
|      | 0    | 1 |      | 0 | 0 | 0.25  | 0.75  |   | 0 | 0 |      | 1    |      | 1.21  |
|      | 0    | 1 |      | 0 | 0 | 0.125 | 0.875 |   | 0 | 0 |      | 1    |      | 1.25  |
|      | 0    | 1 |      | 0 | 0 | 0.9   | 0.1   |   | 0 | 0 |      | 1    |      | 1.43  |
|      | 0    | 1 |      | 0 | 0 | 0.7   | 0.3   |   | 0 | 0 |      | 1    |      | 1.33  |
|      | 0    | 1 |      | 0 | 0 | 0.4   | 0.6   |   | 0 | 0 |      | 1    |      | 1.29  |
|      | 0    | 1 |      | 0 | 0 | 0.2   | 0.8   |   | 0 | 0 |      | 1    |      | 1.29  |
|      | 0    | 1 |      | 0 | 0 | 0     | 1     |   | 0 | 0 | 1    |      |      | 1.6   |
|      | 0    | 1 |      | 0 | 0 | 1     | 0     |   | 0 | 0 | 0.15 | 2.85 |      | 1.62  |
|      | 0    | 1 |      | 0 | 0 | 1     | 0     |   | 0 | 0 | 0.5  | 2.5  |      | 1.965 |
|      | 0    | 1 |      | 0 | 0 | 1     | 0     |   | 0 | 0 | 1    | 2    |      | 2.268 |
|      | 0    | 1 |      | 0 | 0 | 1     | 0     |   | 0 | 0 | 1.5  | 1.5  |      | 1.91  |
|      | 0    | 1 |      | 0 | 0 | 1     | 0     |   | 0 | 0 | 2    | 1    |      | 1.969 |
|      | 0    | 1 |      | 0 | 0 | 1     | 0     |   | 0 | 0 | 2.4  | 0.5  |      | 2.139 |
|      | 0    | 1 |      | 0 | 0 | 1     | 0     |   | 0 | 0 | 1    | 1    |      | 1.47  |
|      | 0    | 1 |      | 0 | 0 |       | 0.25  |   | 0 | 0 |      | 1    |      | 1.4   |
|      | 0    | 1 |      | 0 | 0 |       | 1     |   | 0 | 0 |      | 1    |      | 1.43  |
|      | 0    | 1 |      | 0 | 0 | 1     | 0     |   | 0 | 0 | 2.4  | 0    | 0.33 | 2.3   |
|      | 0    | 1 |      | 0 | 0 | 1     | 0     |   | 0 | 0 | 2.4  | 0    | 0.57 | 2.36  |

|   |       |       |   |     |     |   |   |       |       |      |       |
|---|-------|-------|---|-----|-----|---|---|-------|-------|------|-------|
| 0 | 1     | 0     | 0 | 1   | 0   | 0 | 0 | 2.25  | 0     | 0.75 | 2.39  |
| 0 | 1     | 0     | 0 | 1   | 0   | 0 | 0 | 2.1   | 0     | 0.9  | 2.44  |
| 0 | 1     | 0     | 0 | 1   | 0   | 0 | 0 | 2     | 0     | 1    | 2.48  |
| 0 | 1     | 0     | 0 | 1   | 0   | 0 | 0 | 0.095 | 0.905 |      | 1.59  |
| 0 | 1     | 0     | 0 | 1   | 0   | 0 | 0 | 0.256 | 0.744 |      | 1.7   |
| 0 | 0.1   | 0.9   | 0 | 1   | 0   | 0 | 0 | 0.3   | 2.9   |      | 1.592 |
| 0 | 0.2   | 0.8   | 0 | 1   | 0   | 0 | 0 | 0.3   | 2.9   |      | 1.59  |
| 0 | 0.3   | 0.7   | 0 | 1   | 0   | 0 | 0 | 0     | 1     |      | 1.62  |
| 0 | 0.83  | 0.17  | 0 | 1   | 0   | 0 | 0 | 0.5   | 2.5   |      | 1.61  |
| 0 | 0.83  | 0.17  | 0 | 1   | 0   | 0 | 0 | 0.5   | 2.51  |      | 1.6   |
| 0 | 0.5   | 0.5   | 0 | 1   | 0   | 0 | 0 |       | 1     |      | 1.25  |
| 0 | 0.6   | 0.4   | 0 | 1   | 0   | 0 | 0 |       | 1     |      | 1.25  |
| 0 | 0.15  | 0.85  | 0 | 0.5 | 0.5 | 0 | 0 | 2.4   | 0.45  |      | 1.53  |
| 0 | 0.85  | 0.15  | 0 | 0.4 | 0.6 | 0 | 0 | 0.45  | 2.55  |      | 1.6   |
| 0 | 0.83  | 0.17  | 0 | 1   | 0   | 0 | 0 | 0.51  | 2.49  |      | 1.6   |
| 0 | 0.9   | 0.1   | 0 | 1   | 0   | 0 | 0 | 0.1   | 2.9   |      | 1.52  |
| 0 | 0.85  | 0.15  | 0 | 1   | 0   | 0 | 0 | 0.45  | 2.55  |      | 1.5   |
| 0 | 0.75  | 0.25  | 0 | 1   | 0   | 0 | 0 | 0.75  | 2.25  |      | 1.61  |
| 0 | 0.4   | 0.6   | 0 | 1   | 0   | 0 | 0 | 0.2   | 2.8   |      | 1.5   |
| 0 | 0.1   | 0.9   | 0 | 1   | 0   | 0 | 0 |       | 1     |      | 1.59  |
| 0 | 0.2   | 0.8   | 0 | 1   | 0   | 0 | 0 |       | 1     |      | 1.57  |
| 0 | 0.3   | 0.7   | 0 | 1   | 0   | 0 | 0 |       | 1     |      | 1.55  |
| 0 | 0.4   | 0.6   | 0 | 1   | 0   | 0 | 0 |       | 1     |      | 1.54  |
| 0 | 0.7   | 0.3   | 0 | 1   | 0   | 0 | 0 |       | 1     |      | 1.503 |
| 0 | 0.6   | 0.4   | 0 | 1   | 0   | 0 | 0 |       | 0.4   |      | 1.25  |
| 0 | 0.83  | 0.17  | 0 | 1   | 0.6 | 0 | 0 | 0.51  | 2.49  |      | 1.61  |
| 0 | 0.95  | 0.05  | 0 | 1   | 0   | 0 | 0 | 0.15  | 2.85  |      | 1.55  |
| 0 | 0.75  | 0.25  | 0 | 0.5 | 0.5 | 0 | 0 |       | 1     |      | 1.36  |
| 0 | 0.1   | 0.9   | 0 | 0   | 1   | 0 | 0 |       | 1     |      | 1.55  |
| 0 | 0.8   | 0.2   | 0 | 1   | 0   | 0 | 0 | 0.6   | 2.4   |      | 1.59  |
| 0 | 0.1   | 0.9   | 0 | 1   | 0   | 0 | 0 | 2.4   | 0.3   |      | 2.14  |
| 0 | 0.3   | 0.7   | 0 | 0.7 | 0.3 | 0 | 0 | 2.1   | 0.9   |      | 2.03  |
| 0 | 0.5   | 0.5   | 0 | 1   | 0   | 0 | 0 | 1.5   | 1.5   |      | 1.82  |
| 0 | 0.7   | 0.3   | 0 | 1   | 0   | 0 | 0 | 0.9   | 2.1   |      | 1.71  |
| 0 | 0.9   | 0.1   | 0 | 1   | 0   | 0 | 0 | 0.3   | 2.7   |      | 1.8   |
| 0 | 0.85  | 0.15  | 0 | 1   | 0   | 0 | 0 | 0.21  | 2.79  |      | 1.56  |
| 0 | 1     | 1     | 0 | 1   | 0   | 0 | 0 |       | 1     |      | 1.5   |
| 0 | 0.96  | 0.04  | 0 | 1   | 0   | 0 | 0 | 0.12  | 2.88  |      | 1.48  |
| 0 | 0.975 | 0.025 | 0 | 1   | 0   | 0 | 0 |       | 1     |      | 1.48  |
| 0 | 0.25  | 0.75  | 0 | 0   | 1   | 0 | 0 |       | 1     |      | 1.33  |
| 0 | 0.5   | 0.5   | 0 | 0   | 1   | 0 | 0 |       | 1     |      | 1.6   |
| 0 | 0.83  | 0.17  | 0 | 0   | 1   | 0 | 0 | 0.39  | 2.61  |      | 1.6   |
| 0 | 0.02  | 0.98  | 0 | 1   | 0   | 0 | 0 |       | 1     |      | 1.51  |
| 0 | 0.05  | 0.95  | 0 | 1   | 0   | 0 | 0 |       | 1     |      | 1.52  |
| 0 | 0.15  | 0.85  | 0 | 1   | 0   | 0 | 0 |       | 1     |      | 1.35  |
| 0 | 0.93  | 0.03  | 0 | 1   | 0   | 0 | 0 | 0.09  | 2.91  |      | 1.55  |
| 0 | 0.84  | 0.16  | 0 | 1   | 0   | 0 | 0 | 0.5   | 1.5   |      | 1.83  |
| 0 | 0.83  | 0.17  | 0 | 1   | 0   | 0 | 0 |       | 1     |      | 1.54  |

|   |       |       |   |      |      |   |   |       |       |       |
|---|-------|-------|---|------|------|---|---|-------|-------|-------|
| 0 | 0.9   | 0.1   | 0 | 1    | 0    | 0 | 0 | 1     | 1.53  |       |
| 0 | 0.125 | 0.875 | 0 | 1    | 0    | 0 | 0 | 1     | 1.55  |       |
| 0 | 0.125 | 0.875 | 0 | 1    | 0    | 0 | 0 | 1     | 1.71  |       |
| 0 | 0.92  | 0.08  | 0 | 1    | 0    | 0 | 0 | 0.24  | 2.76  | 1.56  |
| 0 | 0.85  | 0.15  | 0 | 1    | 0    | 0 | 0 | 1     | 1.53  |       |
| 0 | 0.75  | 0.25  | 0 | 0    | 1    | 0 | 0 | 1     | 1.4   |       |
| 0 | 0.75  | 0.25  | 0 | 0    | 0.95 | 0 | 0 | 1     | 1.4   |       |
| 0 | 0.75  | 0.25  | 0 | 0    | 0.91 | 0 | 0 | 1     | 1.42  |       |
| 0 | 0.75  | 0.25  | 0 | 0    | 0.8  | 0 | 0 | 1     | 1.53  |       |
| 0 | 0.3   | 0.7   | 0 | 1    | 0    | 0 | 0 | 0.3   | 2.7   | 1.59  |
| 0 | 0.83  | 0.17  | 0 | 1    | 0    | 0 | 0 | 1.2   | 1.8   | 1.72  |
| 0 | 0.83  | 0.17  | 0 | 1    | 0    | 0 | 0 | 0.46  | 2.54  | 1.57  |
| 0 | 0.67  | 0.33  | 0 | 1    | 0    | 0 | 0 | 0.5   | 2.5   | 1.638 |
| 0 | 0.83  | 0.17  | 0 | 1    | 0    | 0 | 0 | 1.5   | 1.5   | 1.84  |
| 0 | 0.75  | 0.25  | 0 | 1    | 0    | 0 | 0 | 0.51  | 2.49  | 1.65  |
| 0 | 0.25  | 0.75  | 0 | 0.75 | 0.25 | 0 | 0 | 0     | 1     | 1.34  |
| 0 | 0.5   | 0.5   | 0 | 0.75 | 0.25 | 0 | 0 | 0     | 1     | 1.33  |
| 0 | 0.75  | 0.25  | 0 | 0.75 | 0.25 | 0 | 0 | 0     | 1     | 1.33  |
| 0 | 0.6   | 0.4   | 0 | 0.6  | 0.6  | 0 | 0 | 0     | 1     | 1.25  |
| 0 | 0.5   | 0.5   | 0 | 0.5  | 0.5  | 0 | 0 | 0     | 1     | 1.2   |
| 0 | 0.6   | 0.4   | 0 | 0.4  | 0.6  | 0 | 0 | 0     | 1     | 1.27  |
| 0 | 0.6   | 0.4   | 0 | 0.6  |      | 0 | 0 | 0     | 1     | 1.25  |
| 0 | 0.6   | 0.4   | 0 | 0.4  | 0.6  | 0 | 0 | 0.12  | 2.88  | 1.26  |
| 0 | 0.6   | 0.4   | 0 | 0.4  | 0.6  | 0 | 0 | 0.18  | 2.82  | 1.272 |
| 0 | 0.6   | 0.4   | 0 | 0.4  | 0.6  | 0 | 0 | 0.24  | 2.76  | 1.28  |
| 0 | 0.6   | 0.4   | 0 | 0.4  | 0.6  | 0 | 0 | 0.48  | 2.52  | 1.32  |
| 0 | 0.6   | 0.4   | 0 | 0.4  | 0.6  | 0 | 0 | 0.3   | 2.7   | 1.36  |
| 0 | 0.4   | 0.6   | 0 | 1    | 0    | 0 | 0 | 0     | 1     | 1.6   |
| 0 | 0.4   | 0.6   | 0 | 1    | 0    | 0 | 0 | 0.025 | 2.975 | 1.6   |
| 0 | 0.83  | 0.17  | 0 | 1    | 0    | 0 | 0 | 1     | 2     | 1.684 |
| 0 | 0.83  | 0.17  | 0 | 1    | 0    | 0 | 0 | 2     | 1     | 1.976 |
| 0 | 0.83  | 0.17  | 0 | 1    | 0    | 0 | 0 | 2.4   | 0.5   | 2.113 |
| 0 | 0.83  | 0.17  | 0 | 1    | 0    | 0 | 0 | 1     | 0     | 2.278 |
| 0 | 0.67  | 0.33  | 0 | 1    | 0    | 0 | 0 | 0     | 1     | 1.528 |
| 0 | 0.67  | 0.33  | 0 | 1    | 0    | 0 | 0 | 1     | 2     | 1.682 |
| 0 | 0.67  | 0.33  | 0 | 1    | 0    | 0 | 0 | 1.5   | 1.5   | 1.848 |
| 0 | 0.67  | 0.33  | 0 | 1    | 0    | 0 | 0 | 2     | 1     | 1.969 |
| 0 | 0.67  | 0.33  | 0 | 1    | 0    | 0 | 0 | 2.4   | 0.5   | 2.115 |
| 0 | 0.67  | 0.33  | 0 | 1    | 0    | 0 | 0 | 1     | 0     | 2.28  |
| 0 | 0.5   | 0.5   | 0 | 1    | 0    | 0 | 0 | 0     | 1     | 1.546 |
| 0 | 0.5   | 0.5   | 0 | 1    | 0    | 0 | 0 | 0.5   | 2.5   | 1.612 |
| 0 | 0.5   | 0.5   | 0 | 1    | 0    | 0 | 0 | 1     | 2     | 1.751 |
| 0 | 0.5   | 0.5   | 0 | 1    | 0    | 0 | 0 | 2     | 1     | 1.957 |
| 0 | 0.5   | 0.5   | 0 | 1    | 0    | 0 | 0 | 2.4   | 0.5   | 2.141 |
| 0 | 0.5   | 0.5   | 0 | 1    | 0    | 0 | 0 | 1     | 0     | 2.28  |
| 0 | 0.17  | 0.83  | 0 | 1    | 0    | 0 | 0 | 0     | 1     | 1.588 |
| 0 | 0.17  | 0.83  | 0 | 1    | 0    | 0 | 0 | 0.5   | 2.5   | 1.625 |
| 0 | 0.17  | 0.83  | 0 | 1    | 0    | 0 | 0 | 1     | 2     | 1.764 |

|   |       |       |   |      |      |   |   |       |       |       |
|---|-------|-------|---|------|------|---|---|-------|-------|-------|
| 0 | 0.17  | 0.83  | 0 | 1    | 0    | 0 | 0 | 1.5   | 1.5   | 1.858 |
| 0 | 0.17  | 0.83  | 0 | 1    | 0    | 0 | 0 | 2     | 1     | 1.989 |
| 0 | 0.17  | 0.83  | 0 | 1    | 0    | 0 | 0 | 2.4   | 0.5   | 2.153 |
| 0 | 0.17  | 0.83  | 0 | 1    | 0    | 0 | 0 | 1     | 0     | 2.296 |
| 0 | 0.81  | 0.19  | 0 | 1    | 0    | 0 | 0 | 0.54  | 2.46  | 1.62  |
| 0 | 0.82  | 0.18  | 0 | 1    | 0    | 0 | 0 | 0.53  | 2.47  | 1.64  |
| 0 | 0.83  | 0.17  | 0 | 1    | 0    | 0 | 0 | 0.52  | 2.48  | 1.64  |
| 0 | 0.84  | 0.16  | 0 | 1    | 0    | 0 | 0 | 0.51  | 2.49  | 1.64  |
| 0 | 0.84  | 0.16  | 0 | 1    | 0    | 0 | 0 | 0.5   | 2.5   | 1.65  |
| 0 | 0.85  | 0.15  | 0 | 1    | 0    | 0 | 0 | 0.5   | 2.5   | 1.65  |
| 0 | 1     | 1     | 0 | 1    | 0    | 0 | 0 | 0     | 1     | 1.546 |
| 0 | 0.75  | 0.25  | 0 | 0    | 1    | 0 | 0 | 0     | 1     | 1.33  |
| 0 | 0.4   | 0.6   | 0 | 1    | 0    | 0 | 0 | 0.1   | 2.9   | 1.51  |
| 0 | 0.75  | 0.25  | 0 | 1    | 0    | 0 | 0 | 0.45  | 2.55  | 1.62  |
| 0 | 0.71  | 0.29  | 0 | 1    | 0    | 0 | 0 | 0.42  | 2.58  | 1.62  |
| 0 | 0.66  | 0.34  | 0 | 1    | 0    | 0 | 0 | 0.42  | 2.58  | 1.62  |
| 0 | 0.85  | 0.15  | 0 | 1    | 0    | 0 | 0 | 0     | 1     | 1.56  |
| 0 | 0.6   | 0.4   | 0 | 1    | 0    | 0 | 0 | 0     | 1     | 1.54  |
| 0 | 0.25  | 0.75  | 0 | 1    | 0    | 0 | 0 | 0     | 1     | 1.54  |
| 0 | 0.75  | 0.25  | 0 | 1    | 0    | 0 | 0 | 0     | 1     | 1.53  |
| 0 | 1     | 1     | 0 | 1    | 0    | 0 | 0 | 1     | 0     | 1.6   |
| 0 | 0.85  | 0.15  | 0 | 1    | 0    | 0 | 0 | 0.15  | 0.85  | 1.6   |
| 0 | 0.83  | 0.17  | 0 | 1    | 0    | 0 | 0 | 0.51  | 2.59  | 1.6   |
| 0 | 0.83  | 0.17  | 0 | 1    | 0    | 0 | 0 | 0.49  | 2.51  | 1.6   |
| 0 | 0.9   | 0.1   | 0 | 1    | 0    | 0 | 0 | 0     | 1     | 1.54  |
| 0 | 0.44  | 0.56  | 0 | 1    | 0    | 0 | 0 | 0.33  | 2.67  | 1.62  |
| 0 | 0.66  | 0.34  | 0 | 1    | 0    | 0 | 0 | 0     | 1     | 1.533 |
| 0 | 0.25  | 0.75  | 0 | 0    | 1    | 0 | 0 | 0     | 1     | 1.36  |
| 0 | 0.5   | 0.5   | 0 | 0    | 1    | 0 | 0 | 0     | 1     | 1.38  |
| 0 | 0.85  | 0.15  | 0 | 1    | 0    | 0 | 0 | 0.6   | 2.4   | 1.616 |
| 0 | 0.1   | 0.9   | 0 | 1    | 0    | 0 | 0 | 0     | 1     | 1.58  |
| 0 | 0.15  | 0.85  | 0 | 1    | 0    | 0 | 0 | 0     | 1     | 1.63  |
| 0 | 0.976 | 0.024 | 0 | 1    | 0    | 0 | 0 | 0.075 | 2.925 | 1.54  |
| 0 | 0.84  | 0.16  | 0 | 1    | 0    | 0 | 0 | 0.4   | 2.6   | 1.53  |
| 0 | 0.83  | 0.17  | 0 | 1    | 0    | 0 | 0 | 0.47  | 2.53  | 1.61  |
| 0 | 0.87  | 0.13  | 0 | 1    | 0    | 0 | 0 | 0     | 1     | 1.5   |
| 0 | 0.92  | 0.08  | 0 | 1    | 0    | 0 | 0 | 0     | 1     | 1.55  |
| 0 | 0.8   | 0.2   | 0 | 1    | 0    | 0 | 0 | 0     | 1     | 1.35  |
| 0 | 0.83  | 0.17  | 0 | 1    | 0    | 0 | 0 | 0.03  | 2.97  | 1.6   |
| 0 | 0.9   | 0.1   | 0 | 1    | 0    | 0 | 0 | 0.03  | 2.97  | 1.581 |
| 0 | 0.83  | 0.17  | 0 | 1    | 0    | 0 | 0 | 0.33  | 2.67  | 1.59  |
| 0 | 0.1   | 0.9   | 0 | 0.9  | 0.1  | 0 | 0 | 0     | 1     | 1.44  |
| 0 | 0.33  | 0.66  | 0 | 0.66 | 0.33 | 0 | 0 | 0     | 1     | 1.3   |
| 0 | 1     | 1     | 0 | 1    | 0    | 0 | 0 | 1     | 1     | 1.96  |
| 0 | 0.88  | 0.12  | 0 | 1    | 0    | 0 | 0 | 0     | 1     | 1.53  |
| 0 | 0.6   | 0.4   | 0 | 1    | 0    | 0 | 0 | 0.095 | 0.905 | 1.64  |
| 0 | 0.7   | 0.3   | 0 | 1    | 0    | 0 | 0 | 0.095 | 0.905 | 1.63  |
| 0 | 0.8   | 0.2   | 0 | 1    | 0    | 0 | 0 | 0.095 | 0.905 | 1.61  |

|   |       |       |     |      |      |   |   |       |       |       |
|---|-------|-------|-----|------|------|---|---|-------|-------|-------|
| 0 | 0.9   | 0.1   | 0   | 1    | 0    | 0 | 0 | 0.095 | 0.905 | 1.61  |
| 0 | 0.6   | 0.4   | 0   | 1    | 0    | 0 | 0 | 0.256 | 0.744 | 1.72  |
| 0 | 0.7   | 0.3   | 0   | 1    | 0    | 0 | 0 | 0.256 | 0.744 | 1.71  |
| 0 | 0.8   | 0.2   | 0   | 1    | 0    | 0 | 0 | 0.256 | 0.744 | 1.72  |
| 0 | 0.9   | 0.1   | 0   | 1    | 0    | 0 | 0 | 0.256 | 0.744 | 1.7   |
| 0 | 0.05  | 0.95  | 0   | 1    | 0    | 0 | 0 | 0     | 1     | 1.5   |
| 0 | 0.85  | 0.15  | 0   | 1    | 0    | 0 | 0 | 0.55  | 2.55  | 1.58  |
| 0 | 0.026 | 0.974 | 0   | 1    | 0    | 0 | 0 | 0     | 1     | 1.516 |
| 0 | 1     |       | 0   | 1    | 0    | 0 | 0 | 0.45  | 2.55  | 2.23  |
| 0 | 0.48  | 0.52  | 0   | 1    | 0    | 0 | 0 | 0     | 1     | 1.62  |
| 0 | 0.8   | 0.2   | 0   | 1    | 0    | 0 | 0 | 0.22  | 1     | 1.53  |
| 0 | 0.4   | 0.6   | 0   | 1    | 0    | 0 | 0 | 0.6   | 2.4   | 1.68  |
| 0 | 0.6   | 0.4   | 0   | 1    | 0    | 0 | 0 | 0.4   | 2.6   | 1.58  |
| 0 | 0.8   | 0.2   | 0   | 1    | 0    | 0 | 0 | 0.2   | 2.8   | 1.53  |
| 0 | 0.7   | 0.3   | 0   | 1    | 0    | 0 | 0 | 0.1   | 2.9   | 1.58  |
| 0 | 0.65  | 0.35  | 0   | 1    | 0    | 0 | 0 | 0     | 1     | 1.52  |
| 0 | 0.3   | 0.7   | 0   | 1    | 0    | 0 | 0 | 0.15  | 2.85  | 1.6   |
| 0 | 0.3   | 0.7   | 0   | 1    | 0    | 0 | 0 | 0.45  | 2.55  | 1.66  |
| 0 | 0.3   | 0.7   | 0   | 1    | 0    | 0 | 0 | 0.6   | 2.4   | 1.69  |
| 0 | 1.5   | 0     | 0.5 | 1    | 0    | 0 | 0 | 0     | 1     | 1.57  |
| 0 | 0.5   | 0     | 1.5 | 1    | 0    | 0 | 0 | 0     | 1     | 1.57  |
| 0 | 0     | 1     | 0   | 1    | 0    | 0 | 0 | 0     | 1     | 1.6   |
| 0 | 0     | 1     | 0   | 1    | 0    | 0 | 0 | 1     | 0     | 2.2   |
| 0 | 0     | 1     | 0   | 1    | 0    | 0 | 0 | 0.09  | 2.91  | 1.61  |
| 0 | 0     | 1     | 0   | 1    | 0    | 0 | 0 | 0.3   | 2.7   | 1.64  |
| 0 | 0     | 1     | 0   | 1    | 0    | 0 | 0 | 0.6   | 2.4   | 1.7   |
| 0 | 0     | 1     | 0   | 1    | 0    | 0 | 0 | 1.8   | 1.2   | 1.92  |
| 0 | 0     | 1     | 0   | 1    | 0    | 0 | 0 | 0.5   | 2.5   | 1.7   |
| 0 | 0     | 1     | 0   | 1    | 0    | 0 | 0 | 0.8   | 2.2   | 1.75  |
| 0 | 0     | 1     | 0   | 1    | 0    | 0 | 0 | 1.2   | 1.8   | 1.83  |
| 0 | 0     | 1     | 0   | 1    | 0    | 0 | 0 | 0.3   | 2.9   | 1.589 |
| 0 | 0     | 1     | 0   | 0    | 1    | 0 | 0 | 0     | 1     | 1.23  |
| 0 | 0     | 1     | 0   | 1    | 0    | 2 | 0 | 1     | 2     | 1.75  |
| 0 | 0     | 1     | 0   | 1    | 0    | 2 | 0 | 2     | 1     | 2.02  |
| 0 | 0     | 1     | 0   | 0.75 | 0.25 | 2 | 0 | 0     | 1     | 1.35  |
| 0 | 0     | 1     | 0   | 1    | 0    | 0 | 0 | 0.32  | 2.68  | 1.64  |
| 0 | 0     | 1     | 0   | 1    | 0    | 0 | 0 | 0.56  | 2.44  | 1.68  |
| 0 | 0     | 1     | 0   | 1    | 0    | 0 | 0 | 1.5   | 1.5   | 1.83  |
| 0 | 0     | 1     | 0   | 1    | 0    | 0 | 0 | 0.1   | 2.9   | 1.6   |
| 0 | 0     | 1     | 0   | 1    | 0    | 0 | 0 | 0.2   | 2.8   | 1.64  |
| 0 | 0     | 1     | 0   | 1    | 0    | 0 | 0 | 0.25  | 2.75  | 1.65  |
| 0 | 0     | 1     | 0   | 1    | 0    | 0 | 0 | 0.7   | 2.3   | 1.68  |
| 0 | 0     | 1     | 0   | 1    | 0    | 0 | 0 | 0.03  | 2.97  | 1.6   |
| 0 | 0     | 1     | 0   | 1    | 0    | 0 | 0 | 0.075 | 2.95  | 1.6   |
| 0 | 0     | 1     | 0   | 1    | 0    | 0 | 0 | 0.15  | 2.85  | 1.6   |
| 0 | 0     | 1     | 0   | 1    | 0    | 0 | 0 | 0.225 | 2.775 | 1.6   |
| 0 | 0     | 1     | 0   | 1    | 0    | 0 | 0 | 0.75  | 2.25  | 1.7   |
| 0 | 0     | 1     | 0   | 1    | 0    | 0 | 0 | 0.9   | 2.1   | 1.75  |

|   |   |   |   |       |      |   |   |      |      |     |       |
|---|---|---|---|-------|------|---|---|------|------|-----|-------|
| 0 | 0 | 1 | 0 | 0.992 | 0    | 0 | 0 | 0    | 1    |     | 1.56  |
| 0 | 0 | 1 | 0 | 0.984 | 0    | 0 | 0 | 0    | 1    |     | 1.56  |
| 0 | 0 | 1 | 0 | 0.969 | 0    | 0 | 0 | 0    | 1    |     | 1.56  |
| 0 | 0 | 1 | 0 | 0.937 | 0    | 0 | 0 | 0    | 1    |     | 1.56  |
| 0 | 0 | 1 | 0 | 0     | 0    | 0 | 0 | 0    | 1    | 2   | 1.41  |
| 0 | 0 | 1 | 0 | 0.75  | 0.25 | 0 | 0 | 0    | 1    | 0   | 1.24  |
| 0 | 0 | 1 | 0 | 0     | 1    | 0 | 0 | 0    | 1    | 0   | 1.27  |
| 0 | 0 | 1 | 0 | 1     | 0    | 0 | 0 | 0    | 1    | 0   | 1.4   |
| 0 | 0 | 1 | 0 | 0     | 1    | 0 | 0 | 2    | 1    | 0   | 1.81  |
| 0 | 0 | 1 | 0 | 0     | 1    | 0 | 0 | 1.8  | 1    | 0.2 | 1.87  |
| 0 | 0 | 1 | 0 | 0     | 1    | 0 | 0 | 1.5  | 1    | 0.5 | 1.97  |
| 0 | 0 | 1 | 0 | 0     | 1    | 0 | 0 | 1    | 2    | 0   | 1.49  |
| 0 | 0 | 1 | 0 | 0     | 1    | 0 | 0 | 0.6  | 2.4  | 0   | 1.36  |
| 0 | 0 | 1 | 0 | 1     | 0    | 0 | 0 | 0.12 | 2.88 | 0   | 1.6   |
| 0 | 0 | 1 | 0 | 1     | 0    | 0 | 0 | 0.33 | 2.67 | 0   | 1.62  |
| 0 | 0 | 1 | 0 | 0     | 1    | 0 | 0 | 0    | 0    | 1   | 2.2   |
| 0 | 0 | 1 | 0 | 0     | 1    | 0 | 0 | 0.6  | 0    | 2.4 | 2.83  |
| 0 | 0 | 1 | 0 | 1     | 0    | 0 | 0 | 2    | 1    | 0   | 1.85  |
| 0 | 0 | 1 | 0 | 1     | 0    | 0 | 0 | 1    | 0    | 0   | 2     |
| 0 | 0 | 1 | 0 | 1     | 0    | 0 | 0 | 1.16 | 1.74 | 0   | 1.9   |
| 0 | 0 | 1 | 0 | 1     | 0    | 0 | 0 | 1    | 2    | 0   | 1.6   |
| 0 | 0 | 1 | 0 | 0     | 0    | 0 | 1 | 0    | 2    |     | 1.52  |
| 0 | 0 | 1 | 0 | 0.5   | 0.5  | 0 | 0 | 0.6  | 2.4  |     | 1.35  |
| 0 | 0 | 1 | 0 | 1     | 0    | 0 | 0 | 0.45 | 2.55 |     | 1.65  |
| 0 | 0 | 1 | 0 | 0     | 1    | 0 | 0 | 0.42 | 2.58 |     | 1.4   |
| 0 | 0 | 1 | 0 | 0     | 1    | 0 | 0 | 1    | 2    |     | 1.46  |
| 0 | 0 | 1 | 0 | 0     | 1    | 0 | 0 | 1.5  | 1.5  |     | 1.57  |
| 0 | 0 | 1 | 0 | 0     | 1    | 0 | 0 | 2    | 1    |     | 1.75  |
| 0 | 0 | 1 | 0 | 0     | 1    | 0 | 0 | 2.4  | 0.36 |     | 1.83  |
| 0 | 0 | 1 | 0 | 1     | 0    | 0 | 0 | 0.05 | 2.95 |     | 1.57  |
| 0 | 0 | 1 | 0 | 1     | 0    | 0 | 0 | 0.08 | 2.92 |     | 1.6   |
| 0 | 0 | 1 | 0 | 1     | 0    | 0 | 0 | 0.18 | 2.82 |     | 1.604 |
| 0 | 0 | 1 | 0 | 1     | 0    | 0 | 0 | 0.39 | 2.61 |     | 1.641 |
| 0 | 0 | 1 | 0 | 1     | 0    | 0 | 0 | 0.87 | 2.13 |     | 1.72  |
| 0 | 0 | 1 | 0 | 1     | 0    | 0 | 0 | 1.14 | 1.86 |     | 1.777 |
| 0 | 0 | 1 | 0 | 1     | 0    | 0 | 0 | 1.41 | 1.59 |     | 1.791 |
| 0 | 0 | 1 | 0 | 1     | 0    | 0 | 0 | 1.74 | 1.26 |     | 1.924 |
| 0 | 0 | 1 | 0 | 1     | 0    | 0 | 0 | 2.13 | 0.87 |     | 2.033 |
| 0 | 0 | 1 | 0 | 1     | 0    | 0 | 0 | 2.4  | 0.48 |     | 2.154 |
| 0 | 0 | 1 | 0 | 0.8   | 0.2  | 0 | 0 | 0    | 1    |     | 1.5   |
| 0 | 0 | 1 | 0 | 0.6   | 0.4  | 0 | 0 | 0    | 1    |     | 1.39  |
| 0 | 0 | 1 | 0 | 0.4   | 0.6  | 0 | 0 | 0    | 1    |     | 1.27  |
| 0 | 0 | 1 | 0 | 0.2   | 0.8  | 0 | 0 | 0    | 1    |     | 1.189 |
| 0 | 0 | 1 | 0 | 0.75  | 0.25 | 0 | 0 | 1.2  | 1.8  |     | 1.59  |
| 0 | 0 | 1 | 0 | 0.5   | 0.5  | 0 | 0 | 1.2  | 1.8  |     | 1.48  |
| 0 | 0 | 1 | 0 | 0.25  | 0.75 | 0 | 0 | 1.2  | 1.8  |     | 1.34  |
| 0 | 0 | 1 | 0 | 0     | 1    | 0 | 0 | 1.2  | 1.8  |     | 1.6   |
| 0 | 0 | 1 | 0 | 0.75  | 0.25 | 0 | 0 | 0.3  | 2.7  |     | 1.43  |



|   |   |      |   |       |       |   |   |       |      |      |
|---|---|------|---|-------|-------|---|---|-------|------|------|
| 0 | 0 | 1    | 0 | 0.75  | 0.25  | 0 | 0 | 0.6   | 2.4  | 1.48 |
| 0 | 0 | 1    | 0 | 0.75  | 0.25  | 0 | 0 | 0.9   | 2.1  | 1.53 |
| 0 | 0 | 1    | 0 | 0.75  | 0.25  | 0 | 0 | 1.5   | 1.5  | 1.65 |
| 0 | 0 | 1    | 0 | 0.75  | 0.25  | 0 | 0 | 1.8   | 1.2  | 1.73 |
| 0 | 0 | 1    | 0 | 0.75  | 0.25  | 0 | 0 | 2.1   | 0.9  | 1.8  |
| 0 | 0 | 1    | 0 | 0.75  | 0.25  | 0 | 0 | 2.4   | 0.6  | 1.9  |
| 0 | 0 | 1    | 0 | 0.75  | 0.25  | 0 | 0 | 2.4   | 0.3  | 1.99 |
| 0 | 0 | 1    | 0 | 0.75  | 0.25  | 0 | 0 | 1     | 0    | 2.03 |
| 0 | 0 | 1    | 0 | 0     | 1     | 0 | 0 | 1     | 0    | 2.15 |
| 0 | 0 | 1    | 0 | 0.7   | 0.3   | 0 | 0 | 0     | 1    | 1.2  |
| 0 | 0 | 1    | 0 | 0.5   | 0.5   | 0 | 0 | 0     | 1    | 1.18 |
| 0 | 0 | 1    | 0 | 0.3   | 0.7   | 0 | 0 | 0     | 1    | 1.17 |
| 0 | 0 | 1    | 0 | 0.25  | 0.75  | 0 | 0 | 0     | 1    | 1.17 |
| 0 | 0 | 1    | 0 | 0.5   | 0.5   | 0 | 0 |       | 1    | 1.3  |
| 0 | 0 | 1    | 0 | 0.25  | 0.75  | 0 | 0 |       | 1    | 1.25 |
| 0 | 0 | 1    | 0 | 0.7   | 0.3   | 0 | 0 |       | 1    | 1.37 |
| 0 | 0 | 1    | 0 | 0.38  | 0.62  | 0 | 0 |       | 1    | 1.22 |
| 0 | 0 | 1    | 0 | 0.2   | 0.8   | 0 | 0 |       | 1    | 1.22 |
| 0 | 0 | 1    | 0 | 0     | 1     | 0 | 0 |       | 1    | 1.28 |
| 0 | 0 | 1    | 0 | 0     | 0.19  | 0 | 0 |       | 1    | 1.31 |
| 0 | 0 | 1    | 0 | 0.9   | 0.1   | 0 | 0 |       | 1    | 1.31 |
| 0 | 0 | 1    | 0 | 0.7   | 0.255 | 0 | 0 |       | 1    | 1.24 |
| 0 | 0 | 0.75 | 0 | 0.25  | 0     | 0 | 0 |       | 1    | 1.38 |
| 0 | 0 | 1    | 0 | 0.875 | 0.125 | 0 | 0 |       | 1    | 1.42 |
| 0 | 0 | 1    | 0 | 0.75  | 0.25  | 0 | 0 |       | 1    | 1.31 |
| 0 | 0 | 1    | 0 | 0.625 | 0.375 | 0 | 0 |       | 1    | 1.25 |
| 0 | 0 | 1    | 0 | 0.375 | 0.625 | 0 | 0 |       | 1    | 1.2  |
| 0 | 0 | 1    | 0 | 0.125 | 0.875 | 0 | 0 |       | 1    | 1.18 |
| 0 | 0 | 1    | 0 | 0.85  | 0.15  | 0 | 0 |       | 1    | 1.37 |
| 0 | 0 | 1    | 0 | 0.65  | 0.35  | 0 | 0 |       | 1    | 1.25 |
| 0 | 0 | 1    | 0 | 0.4   | 0.6   | 0 | 0 | 1     | 1    | 1.16 |
| 0 | 0 | 1    | 0 | 0.4   | 0.6   | 0 | 0 | 0.6   | 2.4  | 1.24 |
| 0 | 0 | 1    | 0 | 0.4   | 0.6   | 0 | 0 | 0.9   | 2.1  | 1.25 |
| 0 | 0 | 1    | 0 | 0.4   | 0.6   | 0 | 0 | 1.2   | 1.8  | 1.26 |
| 0 | 0 | 1    | 0 | 0.4   | 0.6   | 0 | 0 | 1.5   | 1.5  | 1.27 |
| 0 | 0 | 1    | 0 | 0.4   | 0.6   | 0 | 0 | 1.8   | 1.2  | 1.29 |
| 0 | 0 | 1    | 0 | 0.4   | 0.6   | 0 | 0 | 2.1   | 0.9  | 1.3  |
| 0 | 0 | 1    | 0 | 0.4   | 0.6   | 0 | 0 | 2.4   | 0.6  | 1.32 |
| 0 | 0 | 1    | 0 | 0.85  | 0.15  | 0 | 0 | 0     | 1    | 1.32 |
| 0 | 0 | 1    | 0 | 0.7   | 0.255 | 0 | 0 | 0     | 1    | 1.3  |
| 0 | 0 | 1    | 0 | 0.4   | 0.6   | 0 | 0 | 0.4   | 2.6  | 1.26 |
| 0 | 0 | 1    | 0 | 0.2   | 0.8   | 0 | 0 | 0.4   | 2.6  | 1.26 |
| 0 | 0 | 1    | 0 | 0.6   | 0.4   | 0 | 0 | 0.4   | 2.6  | 1.26 |
| 0 | 0 | 1    | 0 | 0.8   | 0.2   | 0 | 0 | 0.4   | 2.6  | 1.26 |
| 0 | 0 | 1    | 0 | 0.95  | 0.05  | 0 | 0 | 0     | 1    | 1.5  |
| 0 | 0 | 1    | 0 | 0.9   | 0.1   | 0 | 0 | 0     | 1    | 1.5  |
| 0 | 0 | 1    | 0 | 1     | 0     | 0 | 0 | 0.033 | 2.97 | 1.6  |
| 0 | 0 | 1    | 0 | 1     | 0     | 0 | 0 | 0.066 | 2.93 | 1.61 |

|   |   |      |   |      |      |      |   |       |       |     |       |
|---|---|------|---|------|------|------|---|-------|-------|-----|-------|
| 0 | 0 | 1    | 0 | 1    | 0    | 0    | 0 | 0.083 | 2.92  |     | 1.61  |
| 0 | 0 | 1    | 0 | 1    | 0    | 0    | 0 | 2.4   | 0.5   |     | 2.161 |
| 0 | 0 | 1    | 0 | 1    | 0    | 0    | 0 | 1     | 1     |     | 1.594 |
| 0 | 0 | 1    | 0 | 1    | 0    | 0    | 0 | 0.4   | 2.6   |     | 1.746 |
| 0 | 0 | 1    | 0 | 1    | 0    | 0    | 0 | 2.25  | 0.75  |     | 1.67  |
| 0 | 0 | 1    | 0 | 0.97 | 0    | 0.03 | 0 | 0     | 1     |     | 1.58  |
| 0 | 0 | 1    | 0 | 0.95 | 0    | 0.05 | 0 | 0     | 1     |     | 1.63  |
| 0 | 0 | 1    | 0 | 0.92 | 0    | 0.08 | 0 | 0     | 1     |     | 1.65  |
| 0 | 0 | 1    | 0 | 0.9  | 0    | 0.1  | 0 | 0     | 1     |     | 1.67  |
| 0 | 0 | 1    | 0 | 1    | 0    | 0    | 0 | 0.075 | 2.925 |     | 1.61  |
| 0 | 0 | 1    | 0 | 1    | 0    | 0    | 0 | 0.36  | 2.64  |     | 1.62  |
| 0 | 0 | 1    | 0 | 1    | 0    | 0    | 0 | 0.78  | 2.22  |     | 1.69  |
| 0 | 0 | 1    | 0 | 1    | 0    | 0    | 0 | 1.77  | 1.23  |     | 1.96  |
| 0 | 0 | 1    | 0 | 1    | 0    | 0    | 0 | 2.4   | 0.15  |     | 2.23  |
| 0 | 0 | 1    | 0 | 1    | 0    | 0    | 0 | 1     |       |     | 2.27  |
| 0 | 0 | 1    | 0 | 1    | 0    | 0    | 0 |       | 1     |     | 1.67  |
| 0 | 0 | 1    | 0 | 0.95 | 0    | 0    | 0 | 0.1   | 2.9   |     | 1.55  |
| 0 | 0 | 1    | 0 | 0.9  | 0.05 | 0    | 0 | 0.1   | 2.9   |     | 1.55  |
| 0 | 0 | 1    | 0 | 0.85 | 0.1  | 0    | 0 | 0.1   | 2.9   |     | 1.44  |
| 0 | 0 | 1    | 0 | 0.8  | 0.15 | 0    | 0 | 0.1   | 2.9   |     | 1.39  |
| 0 | 0 | 1    | 0 | 1    | 0    | 0    | 0 | 0.9   | 1     |     | 1.72  |
| 0 | 0 | 1    | 0 | 1    | 0    | 0    | 0 | 1.25  | 0.75  |     | 1.76  |
| 0 | 0 | 1    | 0 | 1    | 0    | 0    | 0 | 0.11  | 2.89  |     | 1.585 |
| 0 | 0 | 1    | 0 | 1    | 0    | 0    | 0 | 0.14  | 2.86  |     | 1.591 |
| 0 | 0 | 1    | 0 | 1    | 0    | 0    | 0 | 0.33  | 2.67  |     | 1.65  |
| 0 | 0 | 0.98 | 0 | 1    | 0    | 0    | 0 | 0     | 1     |     | 1.59  |
| 0 | 0 | 1    | 0 | 1    | 0    | 0    | 0 | 0     | 2     |     | 2.1   |
| 0 | 0 | 1    | 0 | 1    | 0    | 0    | 0 | 1.7   | 1.3   |     | 1.94  |
| 0 | 0 | 1    | 0 | 1    | 0    | 0    | 0 | 0.81  | 2.19  |     | 1.71  |
| 0 | 0 | 1    | 0 | 0.98 | 0    | 0.02 | 0 |       | 1     |     | 1.5   |
| 0 | 0 | 1    | 0 | 0    | 0    | 0    | 0 | 2     | 0     | 1   | 2.12  |
| 0 | 0 | 1    | 0 | 0    | 0    | 0    | 0 | 1     | 0     | 0.5 | 1.8   |
| 0 | 0 | 1    | 0 | 0.95 | 0    | 0    | 0 |       | 1     |     | 1.632 |
| 0 | 0 | 1    | 0 | 0.9  | 0    | 0    | 0 |       | 1     |     | 1.63  |
| 0 | 0 | 1    | 0 | 0.8  | 0    | 0    | 0 |       | 1     |     | 1.628 |
| 0 | 0 | 1    | 0 | 1    | 0    | 0    | 0 | 0.02  | 2.98  |     | 1.6   |
| 0 | 0 | 1    | 0 | 0    | 1    | 0    | 0 |       |       | 1   | 2.5   |
| 0 | 0 | 1    | 0 | 0    | 1    | 0    | 0 | 0     | 2.6   |     | 1.85  |
| 0 | 0 | 1    | 0 | 0.97 | 0    | 0.03 | 0 | 2.4   | 0.09  |     | 1.59  |
| 0 | 0 | 1    | 0 | 0    | 0    | 0    | 0 | 1     | 0     |     | 1.38  |
| 0 | 0 | 1    | 0 | 0    | 0    | 0    | 0 |       | 1     |     | 1.65  |
| 0 | 0 | 1    | 0 | 0.9  | 0    | 0    | 0 |       | 1     | 0   | 1.61  |
| 0 | 0 | 1    | 0 | 0.5  | 0.5  | 0    | 0 |       | 1     | 0   | 1.21  |
| 0 | 0 | 1    | 0 | 1    | 0    | 0    | 0 |       | 1     | 0   | 1.605 |
| 0 | 0 | 1    | 0 | 1    | 0    | 0    | 0 | 0.4   | 2.6   | 0   | 1.67  |
| 0 | 0 | 1    | 0 | 1    | 0    | 0    | 0 | 0.2   | 2.8   | 0   | 1.63  |
| 0 | 0 | 1    | 0 | 1    | 0    | 0    | 0 | 0.66  | 2.33  | 0   | 1.58  |
| 0 | 0 | 1    | 0 | 1    | 0    | 0    | 0 | 0.33  | 2.66  | 0   | 1.65  |

|   |   |   |      |   |      |      |      |   |      |      |   |      |       |
|---|---|---|------|---|------|------|------|---|------|------|---|------|-------|
|   | 0 | 0 | 1    | 0 | 1    | 0    | 0    | 0 | 1.5  | 1.5  | 0 | 1.72 |       |
|   | 0 | 0 | 1    | 0 | 1    | 0    | 0    | 0 | 0.15 | 2.85 | 0 | 1.57 |       |
|   | 0 | 0 | 1    | 0 | 1    | 0    | 0    | 0 | 0.3  | 2.7  | 0 | 1.58 |       |
|   | 0 | 0 | 1    | 0 | 1    | 0    | 0    | 0 | 0.45 | 2.55 | 0 | 1.6  |       |
|   | 0 | 0 | 1    | 0 | 1    | 0    | 0    | 0 | 0.6  | 2.4  | 0 | 1.62 |       |
|   | 0 | 0 | 1    | 0 | 1    | 0    | 0    | 0 | 0    | 0    | 1 | 2.8  |       |
|   | 0 | 0 | 1    | 0 | 1    | 0    | 0    | 0 | 0    | 2    | 1 | 2.7  |       |
|   | 0 | 0 | 1    | 0 | 0.93 | 0    | 0    | 0 | 0    | 1    | 0 | 1.44 |       |
|   | 0 | 0 | 1    | 0 | 0    | 0    | 0    | 1 | 0    | 2    | 0 | 2.2  |       |
|   | 0 | 0 | 1    | 0 | 1    | 0    | 0    | 0 | 2.1  | 0.9  | 0 | 1.97 |       |
|   | 0 | 0 | 1    | 0 | 1    | 0    | 0    | 0 | 1.26 | 1.74 | 0 | 1.79 |       |
|   | 0 | 0 | 1    | 0 | 1    | 0    | 0    | 0 | 2.16 | 0.84 | 0 | 2.01 |       |
|   | 0 | 0 | 1    | 0 | 1    | 0    | 0    | 0 | 1.2  | 1.8  | 0 | 1.6  |       |
|   | 0 | 0 | 1    | 0 | 1    | 0    | 0    | 0 | 0.9  | 2.1  | 0 | 1.6  |       |
| 1 |   | 0 | 0    | 0 | 0    | 0    | 0    | 0 | 0    | 1    | 0 | 1.81 |       |
|   | 0 | 1 |      | 0 | 0    | 1    | 0    | 0 | 1    |      | 1 | 1.3  |       |
|   | 0 | 1 | 0    | 1 |      | 1    | 0    | 0 | 0    | 1    |   | 1.72 |       |
|   | 0 | 1 | 0    | 2 |      | 1    | 0    | 0 | 0    | 1    |   | 1.76 |       |
|   | 0 | 0 | 1    |   | 0    | 1    | 0    | 2 | 0    | 1    | 0 | 2.24 |       |
|   | 0 | 0 | 1    |   | 0    | 1    | 0    | 0 | 0    | 1    | 2 | 1.91 |       |
|   | 0 | 0 | 1    |   | 0    | 1    | 0    | 0 | 2    | 1    |   | 2.35 |       |
|   | 0 | 0 | 1    |   | 0    | 0.75 | 0.25 | 0 | 0    | 0    | 1 | 2.05 |       |
|   | 0 | 0 | 1    |   | 1    | 1    |      | 0 | 0    | 0    | 1 | 0    | 1.68  |
|   | 0 | 0 | 0.75 |   | 0.5  |      | 1    | 0 | 0    | 0    | 1 | 0    | 1.74  |
| 1 |   | 0 | 0    | 0 | 0    | 0    | 1    | 0 | 0    | 0    | 1 | 0    | 1.8   |
| 1 |   | 0 | 0    | 0 | 0    | 1    | 0    | 0 | 0    | 0    | 1 | 0    | 1.3   |
| 1 |   | 0 | 0    | 0 | 0    | 1    | 0    | 0 | 0    | 0    | 1 | 0    | 2.05  |
| 1 |   | 0 | 0    | 0 | 0    | 1    | 0    | 0 | 0    | 1    | 0 | 0    | 2.04  |
| 1 |   | 0 | 0    | 0 | 0    | 1    | 0    | 0 | 0    | 1    | 2 | 0    | 1.9   |
| 1 |   | 0 | 0    | 0 | 0    | 1    | 0    | 0 | 0    | 1    | 0 | 0    | 1.89  |
| 1 |   | 0 | 0    | 0 | 0    | 1    | 0    | 0 | 0    | 2    | 1 | 0    | 1.88  |
| 1 |   | 0 | 0    | 0 | 0    | 1    | 0    | 0 | 0    | 0    | 1 | 0    | 1.85  |
| 1 |   | 0 | 0    | 0 | 0    | 1    | 0    | 0 | 0    | 0    | 1 | 0    | 1.93  |
| 1 |   | 0 | 0    | 0 | 0    | 0    | 1    | 0 | 0    | 1    | 0 | 0    | 1.73  |
| 1 |   | 0 | 0    | 0 | 0    | 0    | 0    | 1 | 0    | 0    | 1 | 0    | 1.71  |
| 1 |   | 0 | 0    | 0 | 0    | 1    | 0    | 0 | 0    | 0    | 1 | 0    | 2.01  |
| 1 |   | 0 | 0    | 0 | 0    | 1    | 0    | 0 | 0    | 2    | 1 | 0    | 2.31  |
| 1 |   | 0 | 0    | 0 | 0    | 1    | 0    | 0 | 0    | 1    | 2 | 0    | 2.28  |
| 1 |   | 0 | 0    | 0 | 0    | 1    | 0    | 0 | 0    | 1    | 2 | 0    | 1.89  |
| 1 |   | 0 | 0    | 0 | 0    | 1    | 0    | 0 | 0    | 1    | 2 | 0    | 1.94  |
| 1 |   | 0 | 0    | 0 | 0    | 1    | 0    | 0 | 0    | 1    | 2 | 0    | 2.36  |
| 1 |   | 0 | 0    | 0 | 0    | 1    | 0    | 0 | 0    | 1    | 2 | 0    | 1.69  |
| 1 |   | 0 | 0    | 0 | 0    | 1    | 0    | 0 | 0    | 1    | 0 | 0    | 1.839 |
| 1 |   | 0 | 0    | 0 | 0    | 1    | 0    | 0 | 0    | 0    | 1 | 0    | 2.33  |
| 1 |   | 0 | 0    | 0 | 0    | 1    | 0    | 0 | 0    | 2    | 1 | 0    | 1.79  |
| 1 |   | 0 | 0    | 0 | 0    | 1    | 0    | 0 | 0    | 1    | 0 | 0    | 1.77  |
| 1 |   | 0 | 0    | 0 | 0    | 1    | 0    | 0 | 0    | 1    | 0 | 0    | 1.72  |
| 1 |   | 0 | 0    | 0 | 0    | 1    | 0    | 0 | 0    | 2    | 1 | 0    | 2.34  |

|      |      |   |   |   |      |   |   |      |      |      |   |       |
|------|------|---|---|---|------|---|---|------|------|------|---|-------|
| 1    |      | 0 | 0 | 0 | 1    | 0 | 0 | 0    | 1    | 2    | 0 | 1.9   |
| 1    |      | 0 | 0 | 0 | 1    | 0 | 0 | 0    | 1    | 0    | 0 | 1.82  |
| 1    |      | 0 | 0 | 0 | 1    | 0 | 0 | 0    | 0    | 1    | 0 | 1.56  |
| 1    |      | 0 | 0 | 0 | 1    | 0 | 0 | 0    | 1    | 2    | 0 | 2.39  |
| 1    |      | 0 | 0 | 0 | 1    | 0 | 0 | 0    | 1    | 0    | 0 | 1.75  |
| 1    |      | 0 | 0 | 0 | 1    | 0 | 0 | 0    | 0.15 | 2.85 | 0 | 2.28  |
| 1    |      | 0 | 0 | 0 | 1    | 0 | 0 | 0    | 0    | 1    | 0 | 1.6   |
| 1    |      | 0 | 0 | 0 | 1    | 0 | 0 | 0    | 0    | 1    | 0 | 2.4   |
| 1    |      | 0 | 0 | 0 | 1    | 0 | 0 | 0    | 1    | 0    | 0 | 1.5   |
| 1    |      | 0 | 0 | 0 | 1    | 0 | 0 | 0    | 2    | 1    | 0 | 1.88  |
| 1    |      | 0 | 0 | 0 | 1    | 0 | 0 | 0    | 1    | 2    | 0 | 1.25  |
| 1    |      | 0 | 0 | 0 | 0.96 | 0 | 0 | 0.04 | 0    | 1    | 0 | 1.79  |
| 1    |      | 0 | 0 | 0 | 1    | 0 | 0 | 0    | 0    | 1    | 0 | 1.901 |
| 1    |      | 0 | 0 | 0 | 1    | 0 | 0 | 0    | 0    | 1    | 0 | 1.67  |
| 1    |      | 0 | 0 | 0 | 1    | 0 | 0 | 0    | 1    | 0    | 0 | 1.95  |
| 1    |      | 0 | 0 | 0 | 1    | 0 | 0 | 0    | 0    | 1    | 0 |       |
| 1    |      | 0 | 0 | 0 | 1    | 0 | 0 | 0    | 1    | 0    | 0 | 1.97  |
| 1    |      | 0 | 0 | 0 | 1    | 0 | 0 | 0    | 0    | 1    | 0 | 1.68  |
| 1    |      | 0 | 0 | 0 | 1    | 0 | 0 | 0    | 2    | 1    | 0 | 2.24  |
| 1    |      | 0 | 0 | 0 | 0    | 1 | 0 | 0    | 0    | 1    | 0 | 2.58  |
| 1    |      | 0 | 0 | 0 | 0    | 1 | 0 | 0    | 1    | 0    | 0 | 2.1   |
| 1    |      | 0 | 0 | 0 | 1    | 0 | 0 | 0    | 1    | 2    | 0 | 1.906 |
| 1    |      | 0 | 0 | 0 | 1    | 0 | 0 | 0    | 0    | 1    | 0 | 1.8   |
| 1    |      | 0 | 0 | 0 | 1    | 0 | 0 | 0    | 1    | 2    | 0 | 1.87  |
| 1    |      | 0 | 0 | 0 | 1    | 0 | 0 | 0    | 1    | 2    | 0 | 2.26  |
|      | 1    | 0 | 0 | 0 | 1    | 0 | 0 | 0    | 0    | 1    | 0 | 1.84  |
| 1    |      | 0 | 0 | 0 | 1    | 0 | 0 | 0    | 0    | 1    | 0 | 2.39  |
| 1    |      | 0 | 0 | 0 | 1    | 0 | 0 | 0    | 1    | 0    | 0 | 1.63  |
| 1    |      | 0 | 0 | 0 | 1    | 0 | 0 | 0    | 2    | 1    | 0 | 2.27  |
| 1    |      | 0 | 0 | 0 | 1    | 0 | 0 | 0    | 1    | 2    | 0 | 2.29  |
| 1    |      | 0 | 0 | 0 | 1    | 0 | 0 | 0    | 0    | 1    | 0 | 1.92  |
| 1    |      | 0 | 0 | 0 | 1    | 0 | 0 | 0    | 1    | 2    | 0 | 1.91  |
| 1    |      | 0 | 0 | 0 | 1    | 0 | 0 | 0    | 1    | 0    | 0 | 1.91  |
| 1    |      | 0 | 0 | 0 | 1    | 0 | 0 | 0    | 1    | 2    | 0 | 2.3   |
| 1    |      | 0 | 0 | 0 | 0    | 0 | 0 | 1    | 1    | 0    | 0 | 2.3   |
| 1    |      | 0 | 0 | 0 | 1    | 0 | 0 | 0    | 0    | 1    | 0 | 2.3   |
| 1    |      | 0 | 0 | 0 | 0.97 | 0 | 0 | 0    | 1    | 0    | 0 | 2.3   |
| 1    |      | 0 | 0 | 0 | 0.97 | 0 | 0 | 0    | 1    | 0    | 0 | 1.91  |
| 1    |      | 0 | 0 | 0 | 1    | 0 | 0 | 0    | 2    | 1    | 0 | 1.8   |
| 1    |      | 0 | 0 | 0 | 1    | 0 | 0 | 0    | 1    | 2    | 0 | 1.74  |
| 1    |      | 0 | 0 | 0 | 1    | 0 | 0 | 0    | 1    | 1    | 0 | 1.72  |
|      | 1    | 0 | 0 | 0 | 1    | 0 | 0 | 0    | 1    | 0    | 0 | 1.74  |
| 1    |      | 0 | 0 | 0 | 1    | 0 | 0 | 0    | 1    | 1    | 0 | 1.63  |
| 1    |      | 0 | 0 | 0 | 1    | 0 | 0 | 0    | 1    | 2    | 0 | 1.8   |
|      | 1    | 0 | 0 | 0 | 1    | 0 | 0 | 0    | 1    | 1    | 0 | 1.6   |
|      | 1    | 0 | 0 | 0 | 1    | 0 | 0 | 0    | 2    | 1    | 0 | 1.32  |
|      | 1    | 0 | 0 | 0 | 1    | 0 | 0 | 0    | 0    | 1    | 0 | 1.83  |
| 0.17 | 0.83 | 0 | 0 | 0 | 1    | 0 | 0 | 0    | 1.5  | 1.5  |   | 1.55  |

|       |        |        |   |     |     |   |   |       |       |       |
|-------|--------|--------|---|-----|-----|---|---|-------|-------|-------|
| 0.17  | 0.83   | 0      | 0 | 1   | 0   | 0 | 0 | 1.2   | 1.8   | 1.61  |
| 0.17  | 0.83   | 0      | 0 | 1   | 0   | 0 | 0 | 1.2   | 1.8   | 1.59  |
| 0.17  | 0.83   | 0      | 0 | 1   | 0   | 0 | 0 | 0.51  | 2.49  | 1.57  |
| 0.17  | 0.83   | 0      | 0 | 1   | 0   | 0 | 0 | 1.5   | 1.5   | 1.55  |
| 0.17  | 0.83   | 0      | 0 | 1   | 0   | 0 | 0 | 0.51  | 2.49  | 1.752 |
| 0.2   | 0.8    | 0      | 0 | 0.5 | 0.5 | 0 | 0 |       | 1     | 1.49  |
| 0.17  | 0.83   | 0      | 0 | 1   | 0   | 0 | 0 | 1.5   | 1.5   | 1.51  |
| 0.1   | 0.9    | 0      | 0 | 1   | 0   | 0 | 0 |       | 1     | 1.55  |
| 0.05  | 0.95   | 0      | 0 | 1   | 0   | 0 | 0 | 0     | 1     | 1.57  |
| 0.15  | 0.85   | 0      | 0 | 1   | 0   | 0 | 0 | 0.15  | 2.85  | 1.52  |
| 0.125 | 0.875  | 0      | 0 | 1   | 0   | 0 | 0 | 0.375 | 2.625 | 1.58  |
| 0.2   | 0.8    | 0      | 0 | 1   | 0   | 0 | 0 | 0     | 1     | 1.7   |
| 0.17  | 0.83   | 0      | 0 | 1   | 0   | 0 | 0 | 1.2   | 1.8   | 1.82  |
| 0.1   | 0.9    | 0      | 0 | 1   | 0   | 0 | 0 | 0     | 1     | 1.52  |
| 0.2   | 0.8    | 0      | 0 | 1   | 0   | 0 | 0 | 0     | 1     | 1.64  |
| 0.1   | 0.9    | 0      | 0 | 1   | 0   | 0 | 0 | 0.3   | 2.7   | 1.71  |
| 0.25  | 0.75   | 0      | 0 | 1   | 0   | 0 | 0 | 0     | 1     | 1.48  |
| 0.05  | 0.95   | 0      | 0 | 1   | 0   | 0 | 0 | 0     | 1     | 1.55  |
| 0.3   | 0.7    | 0      | 0 | 1   | 0   | 0 | 0 | 0     | 1     | 1.56  |
| 0.25  | 0.75   | 0      | 0 | 1   | 0   | 0 | 0 | 0.6   | 2.4   | 1.54  |
| 0.2   | 0.8    | 0      | 0 | 1   | 0   | 0 | 0 | 1.2   | 1.8   | 1.554 |
| 0.15  | 0.85   | 0      | 0 | 1   | 0   | 0 | 0 | 0     | 1     | 1.55  |
| 0.5   | 0.5    | 0      | 0 | 1   | 0   | 0 | 0 | 0     | 1     | 1.62  |
| 0.75  | 0.25   | 0      | 0 | 1   | 0   | 0 | 0 | 0     | 1     | 1.555 |
| 0.1   | 0.9    | 0      | 0 | 1   | 0   | 0 | 0 | 0     | 1     | 1.6   |
| 0.17  | 0.83   | 0      | 0 | 1   | 0   | 0 | 0 | 0     | 1     | 1.59  |
| 1     | 1      | 0      | 0 | 1   | 0   | 0 | 0 | 0     | 1     | 1.62  |
| 0.05  | 0.95   | 0      | 0 | 1   | 0   | 0 | 0 | 0     | 1     | 1.65  |
| 0.15  | 0.85   | 0      | 0 | 1   | 0   | 0 | 0 | 0     | 1     | 1.61  |
| 0.05  | 0.95   | 0      | 0 | 1   | 0   | 0 | 0 | 0     | 1     | 1.62  |
| 0.05  | 0.81   | 0.14   | 0 | 1   | 0   | 0 | 0 | 0.45  | 2.55  | 1.63  |
| 0.05  | 0.79   | 0.16   | 0 | 1   | 0   | 0 | 0 | 0.5   | 2.5   | 1.599 |
| 0.05  | 0.79   | 0.16   | 0 | 1   | 0   | 0 | 0 | 0.51  | 2.49  | 1.59  |
| 0.05  | 0.79   | 0.16   | 0 | 1   | 0   | 0 | 0 | 0.51  | 2.49  | 1.6   |
| 0.2   | 0.2    | 0.6    | 0 | 1   | 0   | 0 | 0 | 0     | 1     | 1.59  |
| 0.05  | 0.81   | 0.14   | 0 | 1   | 0   | 0 | 0 | 0.45  | 2.55  | 1.58  |
| 0.05  | 0.79   | 0.16   | 0 | 1   | 0   | 0 | 0 | 0.51  | 2.49  | 1.6   |
| 0.05  | 0.79   | 0.16   | 0 | 1   | 0   | 0 | 0 | 0.51  | 2.49  | 1.84  |
| 0.05  | 0.79   | 0.16   | 0 | 1   | 0   | 0 | 0 | 0.5   | 2.5   | 1.55  |
| 0.05  | 0.79   | 0.16   | 0 | 1   | 0   | 0 | 0 | 0.51  | 2.49  | 1.6   |
| 0.05  | 0.8    | 0.15   | 0 | 1   | 0   | 0 | 0 | 0.45  | 2.55  | 1.5   |
| 0.05  | 0.81   | 0.14   | 0 | 1   | 0   | 0 | 0 | 0.45  | 2.55  | 1.61  |
| 0.05  | 0.7885 | 0.1615 | 0 | 1   | 0   | 0 | 0 | 0.51  | 2.49  | 1.6   |
| 0.05  | 0.79   | 0.16   | 0 | 1   | 0   | 0 | 0 | 0.48  | 2.52  | 1.58  |
| 0.05  | 0.8    | 0.15   | 0 | 1   | 0   | 0 | 0 | 0.45  | 2.55  | 1.5   |
| 0.05  | 0.79   | 0.16   | 0 | 1   | 0   | 0 | 0 | 0.51  | 2.49  | 1.73  |
| 0.05  | 0.7885 | 0.1615 | 0 | 1   | 0   | 0 | 0 | 0.51  | 2.49  | 1.612 |
| 0.05  | 0.7885 | 0.1615 | 0 | 1   | 0   | 0 | 0 | 0.51  | 2.49  | 1.585 |

|      |        |        |   |      |      |   |   |      |      |       |
|------|--------|--------|---|------|------|---|---|------|------|-------|
| 0.07 | 0.79   | 0.14   | 0 | 1    | 0    | 0 | 0 | 0.45 | 2.55 | 1.55  |
| 0.05 | 0.7885 | 0.1615 | 0 | 1    | 0    | 0 | 0 | 0.51 | 2.49 | 1.63  |
| 0.05 | 0.8075 | 0.1425 | 0 | 1    | 0    | 0 | 0 | 0.45 | 2.55 | 1.54  |
| 0.05 | 0.79   | 0.16   | 0 | 1    | 0    | 0 | 0 | 0.45 | 2.55 | 1.61  |
| 0.05 | 0.79   | 0.16   | 0 | 1    | 0    | 0 | 0 | 0.51 | 2.49 | 1.61  |
| 0.05 | 0.81   | 0.14   | 0 | 1    | 0    | 0 | 0 | 0.45 | 2.55 | 1.61  |
| 0.05 | 0.81   | 0.14   | 0 | 1    | 0    | 0 | 0 | 0.45 | 2.55 | 1.6   |
| 0.05 | 0.81   | 0.14   | 0 | 1    | 0    | 0 | 0 | 0.45 | 2.55 | 1.55  |
| 0.05 | 0.79   | 0.16   | 0 | 1    | 0    | 0 | 0 | 0.48 | 2.52 | 1.5   |
| 0.05 | 0.79   | 0.16   | 0 | 1    | 0    | 0 | 0 | 0.48 | 2.52 | 1.7   |
| 0.05 | 0.79   | 0.16   | 0 | 1    | 0    | 0 | 0 | 0    | 1    | 1.58  |
| 0.06 | 0.79   | 0.15   | 0 | 1    | 0    | 0 | 0 | 0.45 | 2.55 | 1.59  |
| 0.05 | 0.79   | 0.16   | 0 | 1    | 0    | 0 | 0 | 0.45 | 2.55 | 1.63  |
| 0.05 | 0.79   | 0.16   | 0 | 1    | 0    | 0 | 0 | 0    | 1    | 1.64  |
| 0.05 | 0.8    | 0.15   | 0 | 1    | 0    | 0 | 0 | 0.45 | 2.55 | 1.63  |
| 0.05 | 0.79   | 0.16   | 0 | 1    | 0    | 0 | 0 | 0.3  | 2.7  | 1.3   |
| 0.05 | 0.81   | 0.14   | 0 | 1    | 0    | 0 | 0 | 0.45 | 2.55 | 1.39  |
| 0.05 | 0.79   | 0.16   | 0 | 1    | 0    | 0 | 0 | 0.45 | 2.55 | 1.62  |
| 0.05 | 0.85   | 0.15   | 0 | 1    | 0    | 0 | 0 | 0.45 | 2.55 | 1.39  |
| 0.06 | 0.79   | 0.15   | 0 | 1    | 0    | 0 | 0 | 0.45 | 2.55 | 1.26  |
| 0.05 | 0.79   | 0.16   | 0 | 1    | 0    | 0 | 0 | 0.5  | 2.5  | 1.41  |
| 0.05 | 0.79   | 0.16   | 0 | 1    | 0    | 0 | 0 | 0.51 | 2.49 | 1.47  |
| 0.1  | 0.75   | 0.15   | 0 | 1    | 0    | 0 | 0 | 0.5  | 2.5  | 1.4   |
| 0.1  |        | 0 0.9  | 0 | 1    | 0    | 0 | 0 |      | 1    | 1.59  |
| 0.1  |        | 0 0.9  | 0 | 1    | 0    | 0 | 0 |      | 1    | 1.4   |
| 0.2  |        | 0 0.8  | 0 | 1    | 0    | 0 | 0 |      | 1    | 2.23  |
| 0.1  |        | 0 0.9  | 0 | 1    | 0    | 0 | 0 |      | 1    | 1.498 |
| 0.1  |        | 0 0.9  | 0 | 0.5  | 0.5  | 0 | 0 |      | 1    | 1.37  |
| 0.1  |        | 0 0.9  | 0 | 0.25 | 0.75 | 0 | 0 |      | 1    | 1.22  |
|      | 0 1    |        | 0 | 1    | 0    | 0 | 0 |      | 1    | 1.3   |
|      | 0 1    |        | 0 | 1    | 0    | 0 | 0 |      | 1    | 1.22  |
|      | 0 1    |        | 0 | 1    | 0    | 0 | 0 |      | 1    | 1.2   |
|      | 0 1    |        | 0 | 0    | 1    | 0 | 0 |      | 1    | 1.3   |
|      | 0 1    |        | 0 | 1    | 0    | 0 | 0 | 1    |      | 1.39  |
|      | 0 1    |        | 0 | 1    | 0    | 0 | 0 |      | 1    | 1.51  |
|      | 0 1    |        | 0 | 0.75 | 0.25 | 0 | 0 |      | 1    | 1.517 |
|      | 0 1    |        | 0 | 0.5  | 0.5  | 0 | 0 |      | 1    | 1.38  |
|      | 0 1    |        | 0 | 0    | 1    | 0 | 0 |      | 1    | 1.6   |
|      | 0 1    |        | 0 | 0.5  | 0.5  | 0 | 0 |      | 1    | 1.6   |
|      | 0 1    |        | 0 | 0    | 1    | 0 | 0 |      | 1    | 1.55  |
|      | 0 1    |        | 0 | 0.5  | 0.5  | 0 | 0 |      | 1    | 1.32  |
|      | 0 1    |        | 0 | 0    | 1    | 0 | 0 |      | 1    | 1.54  |
|      | 0 1    |        | 0 | 1    | 0    | 0 | 0 | 0    | 1    | 1.531 |
|      | 0 1    |        | 0 | 1    | 0    | 0 | 0 | 1    |      | 1.512 |
|      | 0 1    |        | 0 | 0    | 1    | 0 | 0 |      | 1    | 1.55  |
|      | 0 1    |        | 0 | 1    | 0    | 0 | 0 |      | 1    | 1.62  |
|      | 0 1    |        | 0 | 0    | 1    | 0 | 0 | 1    | 2    | 1.56  |
|      | 0 1    |        | 0 | 0    | 1    | 0 | 0 |      | 1    | 1.53  |

|   |      |      |   |     |     |   |   |      |      |       |
|---|------|------|---|-----|-----|---|---|------|------|-------|
| 0 | 1    |      | 0 | 1   | 0   | 0 | 0 |      | 1    | 1.54  |
| 0 | 0.5  | 0.5  | 0 | 1   | 0   | 0 | 0 |      | 1    | 1.73  |
| 0 | 0.6  | 0.4  | 0 | 1   | 0   | 0 | 0 |      | 1    | 1.6   |
| 0 | 0.9  | 0.1  | 0 | 1   | 0   | 0 | 0 | 0.1  | 2.9  | 1.528 |
| 0 | 0.83 | 0.17 | 0 | 1   | 0   | 0 | 0 | 0.51 | 2.49 | 1.55  |
| 0 | 0.9  | 0.1  | 0 | 1   | 0   | 0 | 0 | 0.1  | 2.9  | 1.55  |
| 0 | 0.7  | 0.3  | 0 | 1   | 0   | 0 | 0 |      | 1    | 1.56  |
| 0 | 0.1  | 0.9  | 0 | 1   | 0   | 0 | 0 |      | 1    | 1.58  |
| 0 | 0.85 | 0.15 | 0 | 1   | 0   | 0 | 0 | 0.45 | 2.55 | 1.53  |
| 0 | 0.2  | 0.8  | 0 | 1   | 0   | 0 | 0 |      | 1    | 1.59  |
| 0 | 0.1  | 0.9  | 0 | 1   | 0   | 0 | 0 |      | 1    | 1.55  |
| 0 | 0.5  | 0.5  | 0 | 1   | 0   | 0 | 0 |      | 1    | 1.5   |
| 0 | 1    | 1    | 0 | 1   | 0   | 0 | 0 |      | 1    | 1.55  |
| 0 | 0.4  | 0.6  | 0 | 1   | 0   | 0 | 0 | 0.2  | 2.8  | 1.57  |
| 0 | 0.3  | 0.7  | 0 | 1   | 0   | 0 | 0 |      | 1    | 1.57  |
| 0 | 0.4  | 0.6  | 0 | 1   | 0   | 0 | 0 |      | 1    | 1.6   |
| 0 | 0.85 | 0.15 | 0 | 1   | 0   | 0 | 0 | 0.45 | 2.55 | 1.56  |
| 0 | 0.6  | 0.4  | 0 | 1   | 0   | 0 | 0 |      | 1    | 1.65  |
| 0 | 0.2  | 0.8  | 0 | 1   | 0   | 0 | 0 |      | 1    | 1.63  |
| 0 | 0.85 | 0.15 | 0 | 1   | 0   | 0 | 0 | 0.45 | 2.55 | 1.24  |
| 0 | 0.83 | 0.17 | 0 | 1   | 0   | 0 | 0 | 0.51 | 2.49 | 1.57  |
| 0 | 0.9  | 0.1  | 0 | 1   | 0   | 0 | 0 | 0.1  | 2.9  | 1.57  |
| 0 | 0.7  | 0.3  | 0 | 1   | 0   | 0 | 0 |      | 1    | 1.56  |
| 0 | 0.85 | 0.15 | 0 | 1   | 0   | 0 | 0 | 0.45 | 2.55 | 1.53  |
| 0 | 0.83 | 0.17 | 0 | 1   | 0   | 0 | 0 | 0.51 | 2.49 | 1.52  |
| 0 | 0.83 | 0.17 | 0 | 1   | 0   | 0 | 0 | 0.51 | 2.49 | 1.53  |
| 0 | 0.5  | 0.5  | 0 | 0.5 | 0.5 | 0 | 0 | 0    | 1    | 1.629 |
| 0 | 0.85 | 0.15 | 0 | 1   | 0   | 0 | 0 | 0.45 | 2.55 | 1.866 |
| 0 | 0.1  | 0.9  | 0 | 1   | 0   | 0 | 0 |      | 1    | 1.845 |
| 0 | 0.3  | 0.7  | 0 | 1   | 0   | 0 | 0 |      | 1    | 1.638 |
| 0 | 0.7  | 0.3  | 0 | 1   | 0   | 0 | 0 |      | 1    | 1.627 |
| 0 | 0.9  | 0.1  | 0 | 1   | 0   | 0 | 0 |      | 1    | 1.613 |
| 0 | 0.83 | 0.17 | 0 | 1   | 0   | 0 | 0 |      | 1    | 1.58  |
| 0 | 0.83 | 0.17 | 0 | 1   | 0   | 0 | 0 | 0.5  | 2.5  | 1.56  |
| 0 | 0.83 | 0.17 | 0 | 1   | 0   | 0 | 0 | 1.5  | 1.5  | 1.6   |
| 0 | 0.5  | 0.5  | 0 | 1   | 0   | 0 | 0 | 1.5  | 1.5  | 1.51  |
| 0 | 0.83 | 0.17 | 0 | 1   | 0   | 0 | 0 | 0.51 | 2.49 | 1.53  |
| 0 | 0.83 | 0.17 | 0 | 1   | 0   | 0 | 0 | 0.5  | 2.5  | 1.51  |
| 0 | 0.83 | 0.17 | 0 | 1   | 0   | 0 | 0 | 0.5  | 2.5  | 1.645 |
| 0 | 0.85 | 0.15 | 0 | 1   | 0   | 0 | 0 | 0.45 | 2.55 | 1.627 |
| 0 | 0.4  | 0.6  | 0 | 1   | 0   | 0 | 0 | 0.1  | 2.9  | 1.5   |
| 0 | 0.3  | 0.7  | 0 | 1   | 0   | 0 | 0 | 0    | 1    | 1.47  |
| 0 | 0.85 | 0.15 | 0 | 1   | 0   | 0 | 0 | 0.45 | 2.55 | 1.63  |
| 0 | 0.95 | 0.05 | 0 | 1   | 0   | 0 | 0 | 0.15 | 2.85 | 1.64  |
| 0 | 0.95 | 0.05 | 0 | 1   | 0   | 0 | 0 | 0.15 | 2.85 | 1.33  |
| 0 | 0.83 | 0.17 | 0 | 1   | 0   | 0 | 0 | 0.51 | 2.49 | 1.55  |
| 0 | 0.85 | 0.15 | 0 | 1   | 0   | 0 | 0 | 0.5  | 2.5  | 1.51  |
| 0 | 0.9  | 0.1  | 0 | 1   | 0   | 0 | 0 | 0.3  | 2.7  | 1.59  |

|   |      |      |   |      |      |   |   |      |      |       |      |
|---|------|------|---|------|------|---|---|------|------|-------|------|
| 0 | 0.85 | 0.15 | 0 | 1    | 0    | 0 | 0 | 0.45 | 2.55 | 1.63  |      |
| 0 | 0.85 | 0.15 | 0 | 1    | 0    | 0 | 0 | 0.45 | 2.55 | 1.549 |      |
| 0 | 0.83 | 0.17 | 0 | 1    | 0    | 0 | 0 | 0.51 | 2.49 | 1.58  |      |
| 0 | 0.25 | 0.75 | 0 | 0.75 | 0.25 | 0 | 0 | 0    | 1    | 1.55  |      |
| 0 | 0.85 | 0.15 | 0 | 1    | 0    | 0 | 0 | 0    | 1    | 1.61  |      |
| 0 | 0.1  | 0.9  | 0 | 1    | 0    | 0 | 0 | 0    | 1    | 1.36  |      |
| 0 | 0.9  | 0.1  | 0 | 1    | 0    | 0 | 0 | 0.1  | 2.9  | 2.25  |      |
| 0 | 0.83 | 0.17 | 0 | 1    | 0    | 0 | 0 | 0.49 | 2.51 | 1.61  |      |
| 0 | 0.1  | 0.9  | 0 | 1    | 0    | 0 | 0 | 0    | 1    | 1.59  |      |
| 0 | 0.4  | 0.6  | 0 | 1    | 0    | 0 | 0 | 0.2  | 2.8  | 1.55  |      |
| 0 | 0.9  | 0.1  | 0 | 1    | 0    | 0 | 0 | 0    | 1    | 1.55  |      |
| 0 | 0.8  | 0.2  | 0 | 1    | 0    | 0 | 0 | 0.6  | 2.4  | 1.63  |      |
| 0 | 0.5  | 0.5  | 0 | 0.5  | 0.5  | 0 | 0 | 0    | 1    | 1.63  |      |
| 0 | 0.83 | 0.17 | 0 | 1    | 0    | 0 | 0 | 0.51 | 2.49 | 1.59  |      |
| 0 | 0.85 | 0.15 | 0 | 1    | 0    | 0 | 0 | 0.45 | 2.55 | 1.57  |      |
| 0 | 0.85 | 0.15 | 0 | 1    | 0    | 0 | 0 | 0.45 | 2.55 | 1.57  |      |
| 0 | 0.85 | 0.15 | 0 | 1    | 0    | 0 | 0 | 0.45 | 2.55 | 1.55  |      |
| 0 | 0.3  | 0.7  | 0 | 1    | 0    | 0 | 0 | 0    | 1    | 1.65  |      |
| 0 | 0.3  | 0.7  | 0 | 1    | 0    | 0 | 0 | 0.3  | 2.7  | 2.3   |      |
| 0 | 0.85 | 0.15 | 0 | 1    | 0    | 0 | 0 | 0.15 | 0.85 | 1.72  |      |
| 0 | 0.85 | 0.15 | 0 | 1    | 0    | 0 | 0 | 0.45 | 2.55 | 1.6   |      |
| 0 | 0    | 1    | 0 | 1    | 0    | 0 | 0 | 0    | 1    | 2.29  |      |
| 0 | 0    | 1    | 0 | 1    | 0    | 0 | 0 | 0.6  | 2.4  | 1.81  |      |
| 0 | 0    | 1    | 0 | 1    | 0    | 0 | 0 | 0.6  | 2.4  | 2.09  |      |
| 0 | 0    | 1    | 0 | 1    | 0    | 0 | 0 | 0.3  | 2.7  | 2.13  |      |
| 0 | 0    | 1    | 0 | 1    | 0    | 0 | 0 | 1    | 0    | 1.7   |      |
| 0 | 0    | 1    | 0 | 1    | 0    | 0 | 0 | 1    | 0    | 2.8   |      |
| 0 | 0    | 1    | 0 | 1    | 0    | 0 | 0 | 0    | 1    | 1.94  |      |
| 0 | 0    | 1    | 0 | 0    | 1    | 0 | 0 | 0    | 0    | 1     | 1.31 |
| 0 | 0    | 1    | 0 | 1    | 0    | 0 | 0 | 0    | 1    | 0     | 1.53 |
| 0 | 0    | 1    | 0 | 1    | 0    | 0 | 0 | 0    | 1    | 1.48  |      |
| 0 | 0    | 1    | 0 | 1    | 0    | 0 | 0 | 0.15 | 2.85 | 1.65  |      |
| 0 | 0    | 1    | 0 | 1    | 0    | 0 | 0 | 0    | 1    | 1.65  |      |
| 0 | 0    | 1    | 0 | 1    | 0    | 0 | 0 | 0.15 | 2.85 | 1.65  |      |
| 0 | 0    | 1    | 0 | 1    | 0    | 0 | 0 | 0.3  | 2.7  | 1.576 |      |
| 0 | 0    | 1    | 0 | 1    | 0    | 0 | 0 | 0.9  | 2.1  | 1.79  |      |
| 0 | 0    | 1    | 0 | 1    | 0    | 0 | 0 | 0    | 1    | 1.62  |      |
| 0 | 0    | 1    | 0 | 1    | 0    | 0 | 0 | 1    | 2    | 1.34  |      |
| 0 | 0    | 1    | 0 | 1    | 0    | 0 | 0 | 0.3  | 2.7  | 2.08  |      |
| 0 | 0    | 1    | 0 | 0    | 1    | 0 | 0 | 0    | 1    | 1.674 |      |
| 0 | 0    | 1    | 0 | 0    | 1    | 0 | 0 | 0    | 1    | 1.612 |      |
| 0 | 0    | 1    | 0 | 1    | 0    | 0 | 0 | 0.6  | 2.4  | 1.3   |      |
| 0 | 0    | 1    | 0 | 1    | 0    | 0 | 0 | 0    | 1    | 1.56  |      |
| 0 | 0    | 1    | 0 | 0    | 1    | 0 | 0 | 0    | 1    | 1.17  |      |
| 0 | 0    | 1    | 0 | 0    | 1    | 0 | 0 | 1    | 2    | 1.24  |      |
| 0 | 0    | 1    | 0 | 0.5  | 0.5  | 0 | 0 | 0    | 1    | 1.3   |      |
| 0 | 0    | 1    | 0 | 0.75 | 0.25 | 0 | 0 | 0    | 1    | 1.22  |      |
| 0 | 0    | 1    | 0 | 0.5  | 0.5  | 0 | 0 | 0    | 1    | 1.38  |      |



|   |   |   |   |      |       |   |   |      |      |       |
|---|---|---|---|------|-------|---|---|------|------|-------|
| 0 | 0 | 1 | 0 | 0.75 | 0.25  | 0 | 0 | 0    | 1    | 1.28  |
| 0 | 0 | 1 | 0 | 0.5  | 0.5   | 0 | 0 |      | 1    | 1.27  |
| 0 | 0 | 1 | 0 | 0.25 | 0.75  | 0 | 0 |      | 1    | 1.37  |
| 0 | 0 | 1 | 0 | 0    | 1     | 0 | 0 |      | 1    | 1.23  |
| 0 | 0 | 1 | 0 | 0.5  | 0.5   | 0 | 0 |      | 1    | 1.18  |
| 0 | 0 | 1 | 0 | 0.25 | 0.75  | 0 | 0 |      | 1    | 1.22  |
| 0 | 0 | 1 | 0 | 0    | 1     | 0 | 0 |      | 1    | 1.26  |
| 0 | 0 | 1 | 0 | 0.75 | 0.25  | 0 | 0 |      | 1    | 1.26  |
| 0 | 0 | 1 | 0 | 0.7  | 0.255 | 0 | 0 |      | 1    | 1.51  |
| 0 | 0 | 1 | 0 | 0.85 | 0.15  | 0 | 0 | 0    | 1    | 1.6   |
| 0 | 0 | 1 | 0 | 1    | 0     | 0 | 0 | 0.05 | 2.95 | 1.609 |
| 0 | 0 | 1 | 0 | 1    | 0     | 0 | 0 | 0    | 1    | 1.87  |
| 0 | 0 | 1 | 0 | 1    | 0     | 0 | 0 | 1.5  | 1.5  | 1.656 |
| 0 | 0 | 1 | 0 | 1    | 0     | 0 | 0 | 0.5  | 2.5  | 1.7   |
| 0 | 0 | 1 | 0 | 1    | 0     | 0 | 0 | 1    | 2    | 2.027 |
| 0 | 0 | 1 | 0 | 1    | 0     | 0 | 0 | 2    | 1    | 2.308 |
| 0 | 0 | 1 | 0 | 1    | 0     | 0 | 0 | 1    | 0    | 1.78  |
| 0 | 0 | 1 | 0 | 1    | 0     | 0 | 0 | 2    | 1    | 1.608 |
| 0 | 0 | 1 | 0 | 1    | 0     | 0 | 0 | 0    | 1    | 2.18  |
| 0 | 0 | 1 | 0 | 0    | 1     | 0 | 0 | 1    | 0    | 2.13  |
| 0 | 0 | 1 | 0 | 0    | 1     | 0 | 0 | 2    | 1    | 1.67  |
| 0 | 0 | 1 | 0 | 0    | 1     | 0 | 0 | 1.5  | 1.5  | 1.614 |
| 0 | 0 | 1 | 0 | 1    | 0     | 0 | 0 | 0.2  | 2.8  | 1.638 |
| 0 | 0 | 1 | 0 | 1    | 0     | 0 | 0 | 0.1  | 2.9  | 1.684 |
| 0 | 0 | 1 | 0 | 1    | 0     | 0 | 0 | 0.3  | 2.7  | 1.614 |
| 0 | 0 | 1 | 0 | 1    | 0     | 0 | 0 | 0.3  | 2.7  | 1.65  |
| 0 | 0 | 1 | 0 | 1    | 0     | 0 | 0 | 0.4  | 2.6  | 1.683 |
| 0 | 0 | 1 | 0 | 1    | 0     | 0 | 0 | 0.5  | 2.5  | 1.597 |
| 0 | 0 | 1 | 0 | 1    | 0     | 0 | 0 | 0    | 1    | 1.67  |
| 0 | 0 | 1 | 0 | 1    | 0     | 0 | 0 | 0.75 | 2.25 | 1.67  |
| 0 | 0 | 1 | 0 | 1    | 0     | 0 | 0 | 1.5  | 1.5  | 2.1   |
| 0 | 0 | 1 | 0 | 1    | 0     | 0 | 0 | 0    | 1    | 1.9   |
| 0 | 0 | 1 | 0 | 1    | 0     | 0 | 0 | 1.5  | 1.5  | 1.77  |
| 0 | 0 | 1 | 0 | 1    | 0     | 0 | 0 | 1.2  | 1.8  | 1.77  |
| 0 | 0 | 1 | 0 | 1    | 0     | 0 | 0 | 1    | 2    | 1.71  |
| 0 | 0 | 1 | 0 | 1    | 0     | 0 | 0 | 0.87 | 2.13 | 1.66  |
| 0 | 0 | 1 | 0 | 1    | 0     | 0 | 0 | 0.6  | 2.4  | 1.64  |
| 0 | 0 | 1 | 0 | 1    | 0     | 0 | 0 | 0.5  | 2.5  | 2.3   |
| 0 | 0 | 1 | 0 | 0    | 1     | 0 | 0 | 0    | 0    | 1.65  |
| 0 | 0 | 1 | 0 | 1    | 0     | 0 | 0 | 0.3  | 2.7  | 1.59  |
| 0 | 0 | 1 | 0 | 1    | 0     | 0 | 0 | 0.15 | 2.85 | 1.6   |
| 0 | 0 | 1 | 0 | 1    | 0     | 0 | 0 | 0.45 | 2.55 | 1.64  |
| 0 | 0 | 1 | 0 | 1    | 0     | 0 | 0 | 0.9  | 2.1  | 1.604 |
| 0 | 0 | 1 | 0 | 1    | 0     | 0 | 0 | 0    | 1    | 1.662 |
| 0 | 0 | 1 | 0 | 1    | 0     | 0 | 0 | 0.6  | 2.4  | 1.565 |
| 0 | 0 | 1 | 0 | 1    | 0     | 0 | 0 | 0    | 1    | 1.579 |
| 0 | 0 | 1 | 0 | 1    | 0     | 0 | 0 | 0.09 | 2.91 | 1.597 |
| 0 | 0 | 1 | 0 | 1    | 0     | 0 | 0 | 0.2  | 2.8  | 1.725 |

|   |   |   |   |      |      |   |   |      |      |   |       |      |
|---|---|---|---|------|------|---|---|------|------|---|-------|------|
| 0 | 0 | 1 | 0 | 1    | 0    | 0 | 0 | 1    | 2    |   | 2.05  |      |
| 0 | 0 | 1 | 0 | 1    | 0    | 0 | 0 | 2    | 1    |   | 1.28  |      |
| 0 | 0 | 1 | 0 | 0.85 | 0.15 | 0 | 0 | 0    | 1    |   | 1.77  |      |
| 0 | 0 | 1 | 0 | 0    | 1    | 0 | 0 | 2    | 1    |   | 1.7   |      |
| 0 | 0 | 1 | 0 | 1    | 0    | 0 | 0 | 0.9  | 2.1  |   | 1.67  |      |
| 0 | 0 | 1 | 0 | 1    | 0    | 0 | 0 | 0.6  | 2.4  |   | 1.71  |      |
| 0 | 0 | 1 | 0 | 1    | 0    | 0 | 0 | 1    | 2    |   | 1.94  |      |
| 0 | 0 | 1 | 0 | 1    | 0    | 0 | 0 | 2    | 1    |   | 2.22  |      |
| 0 | 0 | 1 | 0 | 1    | 0    | 0 | 0 | 1    | 0    |   | 1.6   |      |
| 0 | 0 | 1 | 0 | 0.95 | 0    | 0 | 0 | 0.1  | 2.9  |   | 1.575 |      |
| 0 | 0 | 1 | 0 | 1    | 0    | 0 | 0 | 0.1  | 2.9  |   | 1.595 |      |
| 0 | 0 | 1 | 0 | 1    | 0    | 0 | 0 | 0.3  | 2.7  |   | 1.66  |      |
| 0 | 0 | 1 | 0 | 1    | 0    | 0 | 0 | 0.5  | 2.5  |   | 1.569 |      |
| 0 | 0 | 1 | 0 | 1    | 0    | 0 | 0 | 0    | 1    |   | 1.62  |      |
| 0 | 0 | 1 | 0 | 1    | 0    | 0 | 0 | 0.5  | 2.5  |   | 1.672 |      |
| 0 | 0 | 1 | 0 | 1    | 0    | 0 | 0 |      | 1    |   | 1.56  |      |
| 0 | 0 | 1 | 0 | 1    | 0    | 0 | 0 |      | 1    |   | 2.28  |      |
| 0 | 0 | 1 | 0 | 1    | 0    | 0 | 0 | 1    | 0    |   | 1.77  |      |
| 0 | 0 | 1 | 0 | 1    | 0    | 0 | 0 |      | 1    |   | 2.296 |      |
| 0 | 0 | 1 | 0 | 1    | 0    | 0 | 0 |      | 1    |   | 1.4   |      |
| 0 | 0 | 1 | 0 | 0    | 1    | 0 | 0 |      | 1    |   | 1.623 |      |
| 0 | 0 | 1 | 0 | 1    | 0    | 0 | 0 |      | 1    |   | 1.68  |      |
| 0 | 0 | 1 | 0 | 1    | 0    | 0 | 0 | 0.45 | 2.55 |   | 1.71  |      |
| 0 | 0 | 1 | 0 | 1    | 0    | 0 | 0 | 0.6  | 2.4  |   | 1.73  |      |
| 0 | 0 | 1 | 0 | 1    | 0    | 0 | 0 | 0.75 | 2.25 |   | 1.59  |      |
| 0 | 0 | 1 | 0 | 1    | 0    | 0 | 0 | 0.1  | 2.9  |   | 1.62  |      |
| 0 | 0 | 1 | 0 | 1    | 0    | 0 | 0 | 0.2  | 2.8  |   | 1.636 |      |
| 0 | 0 | 1 | 0 | 1    | 0    | 0 | 0 |      | 1    |   | 1.775 |      |
| 0 | 0 | 1 | 0 | 1    | 0    | 0 | 0 | 1    | 2    |   | 1.68  |      |
| 0 | 0 | 1 | 0 | 1    | 0    | 0 | 0 | 0.6  | 2.4  |   | 1.55  |      |
| 0 | 0 | 1 | 0 | 0.75 | 0.25 | 0 | 0 | 0    | 1    |   | 1.548 |      |
| 0 | 0 | 1 | 0 | 1    | 0    | 0 | 0 |      | 1    |   | 1.55  |      |
| 0 | 0 | 1 | 0 | 1    | 0    | 0 | 0 | 0    | 1    | 0 | 1.56  |      |
| 0 | 0 | 1 | 0 | 1    | 0    | 0 | 0 | 0    | 1    | 0 | 1.5   |      |
| 0 | 0 | 1 | 0 | 1    | 0    | 0 | 0 | 0    | 1    | 0 | 2.1   |      |
| 0 | 0 | 1 | 0 | 1    | 0    | 0 | 0 | 1    | 0    | 0 | 1.6   |      |
| 0 | 0 | 1 | 0 | 1    | 0    | 0 | 0 | 1    | 2    |   | 1.53  |      |
| 0 | 0 | 1 | 0 | 1    | 0    | 0 | 0 | 0    | 1    | 0 | 1.5   |      |
| 0 | 0 | 1 | 0 | 1    | 0    | 0 | 0 | 0.3  | 2.7  | 0 | 1.607 |      |
| 0 | 0 | 1 | 0 | 1    | 0    | 0 | 0 | 0    | 1    | 0 | 1.99  |      |
| 0 | 0 | 1 | 0 | 1    | 0    | 0 | 0 | 2    | 1    | 0 | 2.9   |      |
| 0 | 0 | 1 | 0 | 1    | 0    | 0 | 0 | 0    | 1    | 0 | 1.58  |      |
| 1 | 0 |   | 0 | 0    | 1    | 0 | 0 | 0    | 1    | 0 | 0     | 1.6  |
| 1 | 0 |   | 0 | 0    | 1    | 0 | 0 | 0    | 0    | 1 | 0     | 1.6  |
| 0 | 0 |   | 1 | 0    | 1    | 0 | 0 | 0    | 1    | 0 | 0     | 1.6  |
| 0 | 0 | 1 | 1 | 1    | 0    | 0 | 0 | 0    | 1    | 0 | 0     | 1.53 |
